# Supplementary material for: Schnider and Eleveld Models for Propofol Target-Controlled Infusion Anesthesia: A Clinical Comparison
Source: MDPI journal article supplement (doi:10.3390/life13102065), 2023-10-16
Supplement: s1 [file life-2628903-supplementary.pdf › life-2628903-supplementary.pdf]

## Descriptive analysis of population of female patients undergoing breast surgery

| Variables               | Total patients<br>n. 78 | Total adult patients<br>n. 37 | Total older patients<br>n. 41 | Total adults vs. elders<br>P-value |
|-------------------------|-------------------------|-------------------------------|-------------------------------|------------------------------------|
| Age, yrs                | 65 [58.2-71]            | 58 [53-61]                    | 71 [67-74]                    | <0.001                             |
| • Age ≥65 yrs, n (%)    | 41 (52.6)               | 0 (0)                         | 41 (100)                      | <0.001                             |
| Weight, kg              | 65 [58.2-72.7]          | 64 [58-68]                    | 67 [62-75]                    | 0.114                              |
| Height, cm              | 164 [160-168]           | 165 [160-170]                 | 164 [160-167]                 | 0.195                              |
| BMI, kg/m <sup>2</sup>  | 23.9 [22.3-27.6]        | 23.2 [21-26.6]                | 24.9 [23-28]                  | 0.017                              |
| • BMI ≥30, n (%)        | 9 (11.5)                | 2 (5.4)                       | 7 (17.1)                      | 0.159                              |
| ASA, I/II/III, n (%)    |                         |                               |                               | <0.001                             |
| • I                     | 16 (20.5)               | 16 (43.2)                     | 0 (0)                         |                                    |
| • II                    | 58 (74.4)               | 20 (54.1)                     | 38 (92.7)                     |                                    |
| • III                   | 4 (5.1)                 | 1 (2.7)                       | 3 (7.3)                       |                                    |
| Propofol total dose, mg | 517.3 [401.4-624.1]     | 512 [450.6-664.1]             | 522 [379.6-573.3]             | 0.344                              |
| Surgery time, min       | 44.5 [34.2-61]          | 45 [34-81]                    | 44 [36-54]                    | 0.420                              |
| Anesthesia time, min    | 65 [54.2-83.5]          | 66 [55-107]                   | 65 [54-75]                    | 0.273                              |
| <b>LoR</b>              |                         |                               |                               |                                    |
| BIS baseline            | 97 [97-98]              | 97 [97-98]                    | 97 [96-98]                    | 0.176                              |
| CeP LOR, µg/ml          | 2.62 [1.64-3.66]        | 2.37 [1.62-3.50]              | 2.7 [1.7-3.80]                | 0.462                              |
| BIS at LoR              | 79 [72-83]              | 79 [65-83]                    | 80 [75-83]                    | 0.469                              |

|                                  |                  |                  |                  |       |
|----------------------------------|------------------|------------------|------------------|-------|
| Time to LoR, min                 | 2 [2-4]          | 2 [1-4]          | 3 [2-4]          | 0.147 |
| <b>Anesthesia maintenance</b>    |                  |                  |                  |       |
| BIS at CePMA <sub>1</sub>        | 48 [44-50]       | 48 [44-50]       | 46 [44-52]       | 0.731 |
| CePMA <sub>1</sub> , µg/ml       | 2.70 [2.40-3.20] | 2.90 [2.40-3.10] | 2.50 [2.40-3.30] | 0.581 |
| Time to CePMA <sub>1</sub> , min | 22.5 [19-29.7]   | 23 [19-30]       | 22 [19-29]       | 0.888 |
| BIS at CePMA <sub>2</sub>        | 48 [44-50]       | 48 [44-50]       | 46 [44-50]       | 0.863 |
| CePMA <sub>2</sub> , µg/ml       | 2.50 [2.30-3.00] | 2.70 [2.20-3.00] | 2.50 [2.30-2.80] | 0.240 |
| <b>RoR</b>                       |                  |                  |                  |       |
| CeP at RoR, µg/ml                | 0.97 [0.60-1.49] | 1.05 [0.73-1.57] | 0.77 [0.55-1.42] | 0.213 |
| BIS at RoR                       | 73 [66-78]       | 72 [66-81]       | 73 [70-78]       | 0.691 |
| Time to RoR                      | 9 [7-12]         | 10 [7-12]        | 9 [7-12]         | 0.327 |
| Δ CeP, µg/ml                     | 1.72 [0.52-2.87] | 1.27 [0.37-2.65] | 2.23 [0.70-3.10] | 0.098 |
| <b>Unwanted events</b>           |                  |                  |                  |       |
| DAE, n (%)                       | 39 (50)          | 21 (56.8)        | 18 (43.9)        | 0.365 |
| BSE, n (%)                       | 13 (16.7)        | 6 (16.2)         | 7 (17.1)         | 1.00  |
| LAE, n (%)                       | 3 (3.8)          | 2 (5.4)          | 1 (2.4)          | 0.601 |
| USRE, n (%)                      | 3 (3.8)          | 2 (5.4)          | 1 (2.4)          | 0.601 |

BMI: body mass index; ASA: American Society of Anesthesiologists physical status classification; LoR: loss of responsiveness; MA: maintenance of anesthesia; RoR: return of responsiveness; BIS: Bispectral Index; CeP: concentrations at the effect site (Ce) of propofol; CePMA<sub>1</sub>: initial CeP during MA; CePMA<sub>2</sub>: final CeP during MA; Δ CeP: difference between CeP LoR and CeP ROR; LAE: lightening of anesthesia event; USRE: unwanted spontaneous responsiveness event; DAE: deepening of anesthesia event; BSuppE: burst suppression event.

**Figure S1.** Dispersion graph of the relation between CeP LoR and age, height, body weight and BMI in female patients undergoing propofol total intravenous anesthesia (TIVA) with target controlled infusion (TCI) using Schnider PK-PD model (39 patients) and Eleveld PK-PD model (39 patients) for breast surgery. Bravais-Pearson's correlation test was used to determine the strength and direction of association between CeP LoR and age, height, body weight, body mass index (BMI). Correlation coefficient (CC), 95% confidence interval (95%CI), and p-values were determined.

**Figure S2.** Dispersion graph of the relation between BIS-guided CePMA1 and age, height, body weight and BMI in female patients undergoing propofol undergoing propofol total intravenous anesthesia (TIVA) with targeted controlled infusion (TCI) using Schnider PK-PD model (39 patients) and Eleveld PK-PD model (39 patients) for breast surgery. Bravais-Pearson's correlation test was used to determine the strength and direction of association between BIS-guided initial CeP and age, height, body weight, body mass index (BMI). Correlation coefficient (CC), 95% confidence interval (95%CI), and p-values were determined.

**Figure S3.** Dispersion graph of the relation between BIS-guided CePMA2 and age, height, body weight and BMI in female patients undergoing propofol undergoing propofol total intravenous anesthesia (TIVA) with target controlled infusion (TCI) using Schnider PK-PD model (39 patients) and Eleveld PK-PD model (39 patients) for breast surgery. Bravais-Pearson's correlation test was used to determine the strength and direction of association between BIS-guided final CeP and age, height, body weight, body mass index (BMI). Correlation coefficient (CC), 95% confidence interval (95%CI), and p-values were determined.

**Figure S4.** Dispersion graph of the relation between CeP RoR and age, height, body weight and BMI in female patients undergoing propofol total intravenous anesthesia (TIVA) with targeted controlled infusion (TCI) using Schnider PK-PD model (39 patients) and Eleveld PK-PD model (39 patients) for breast surgery. Bravais-Pearson's correlation test was used to determine the strength and direction of association between CeP RoR and age, height, body weight, body mass index (BMI). Correlation coefficient (CC), 95% confidence interval (95%CI), and p-values were determined.

Figure S1

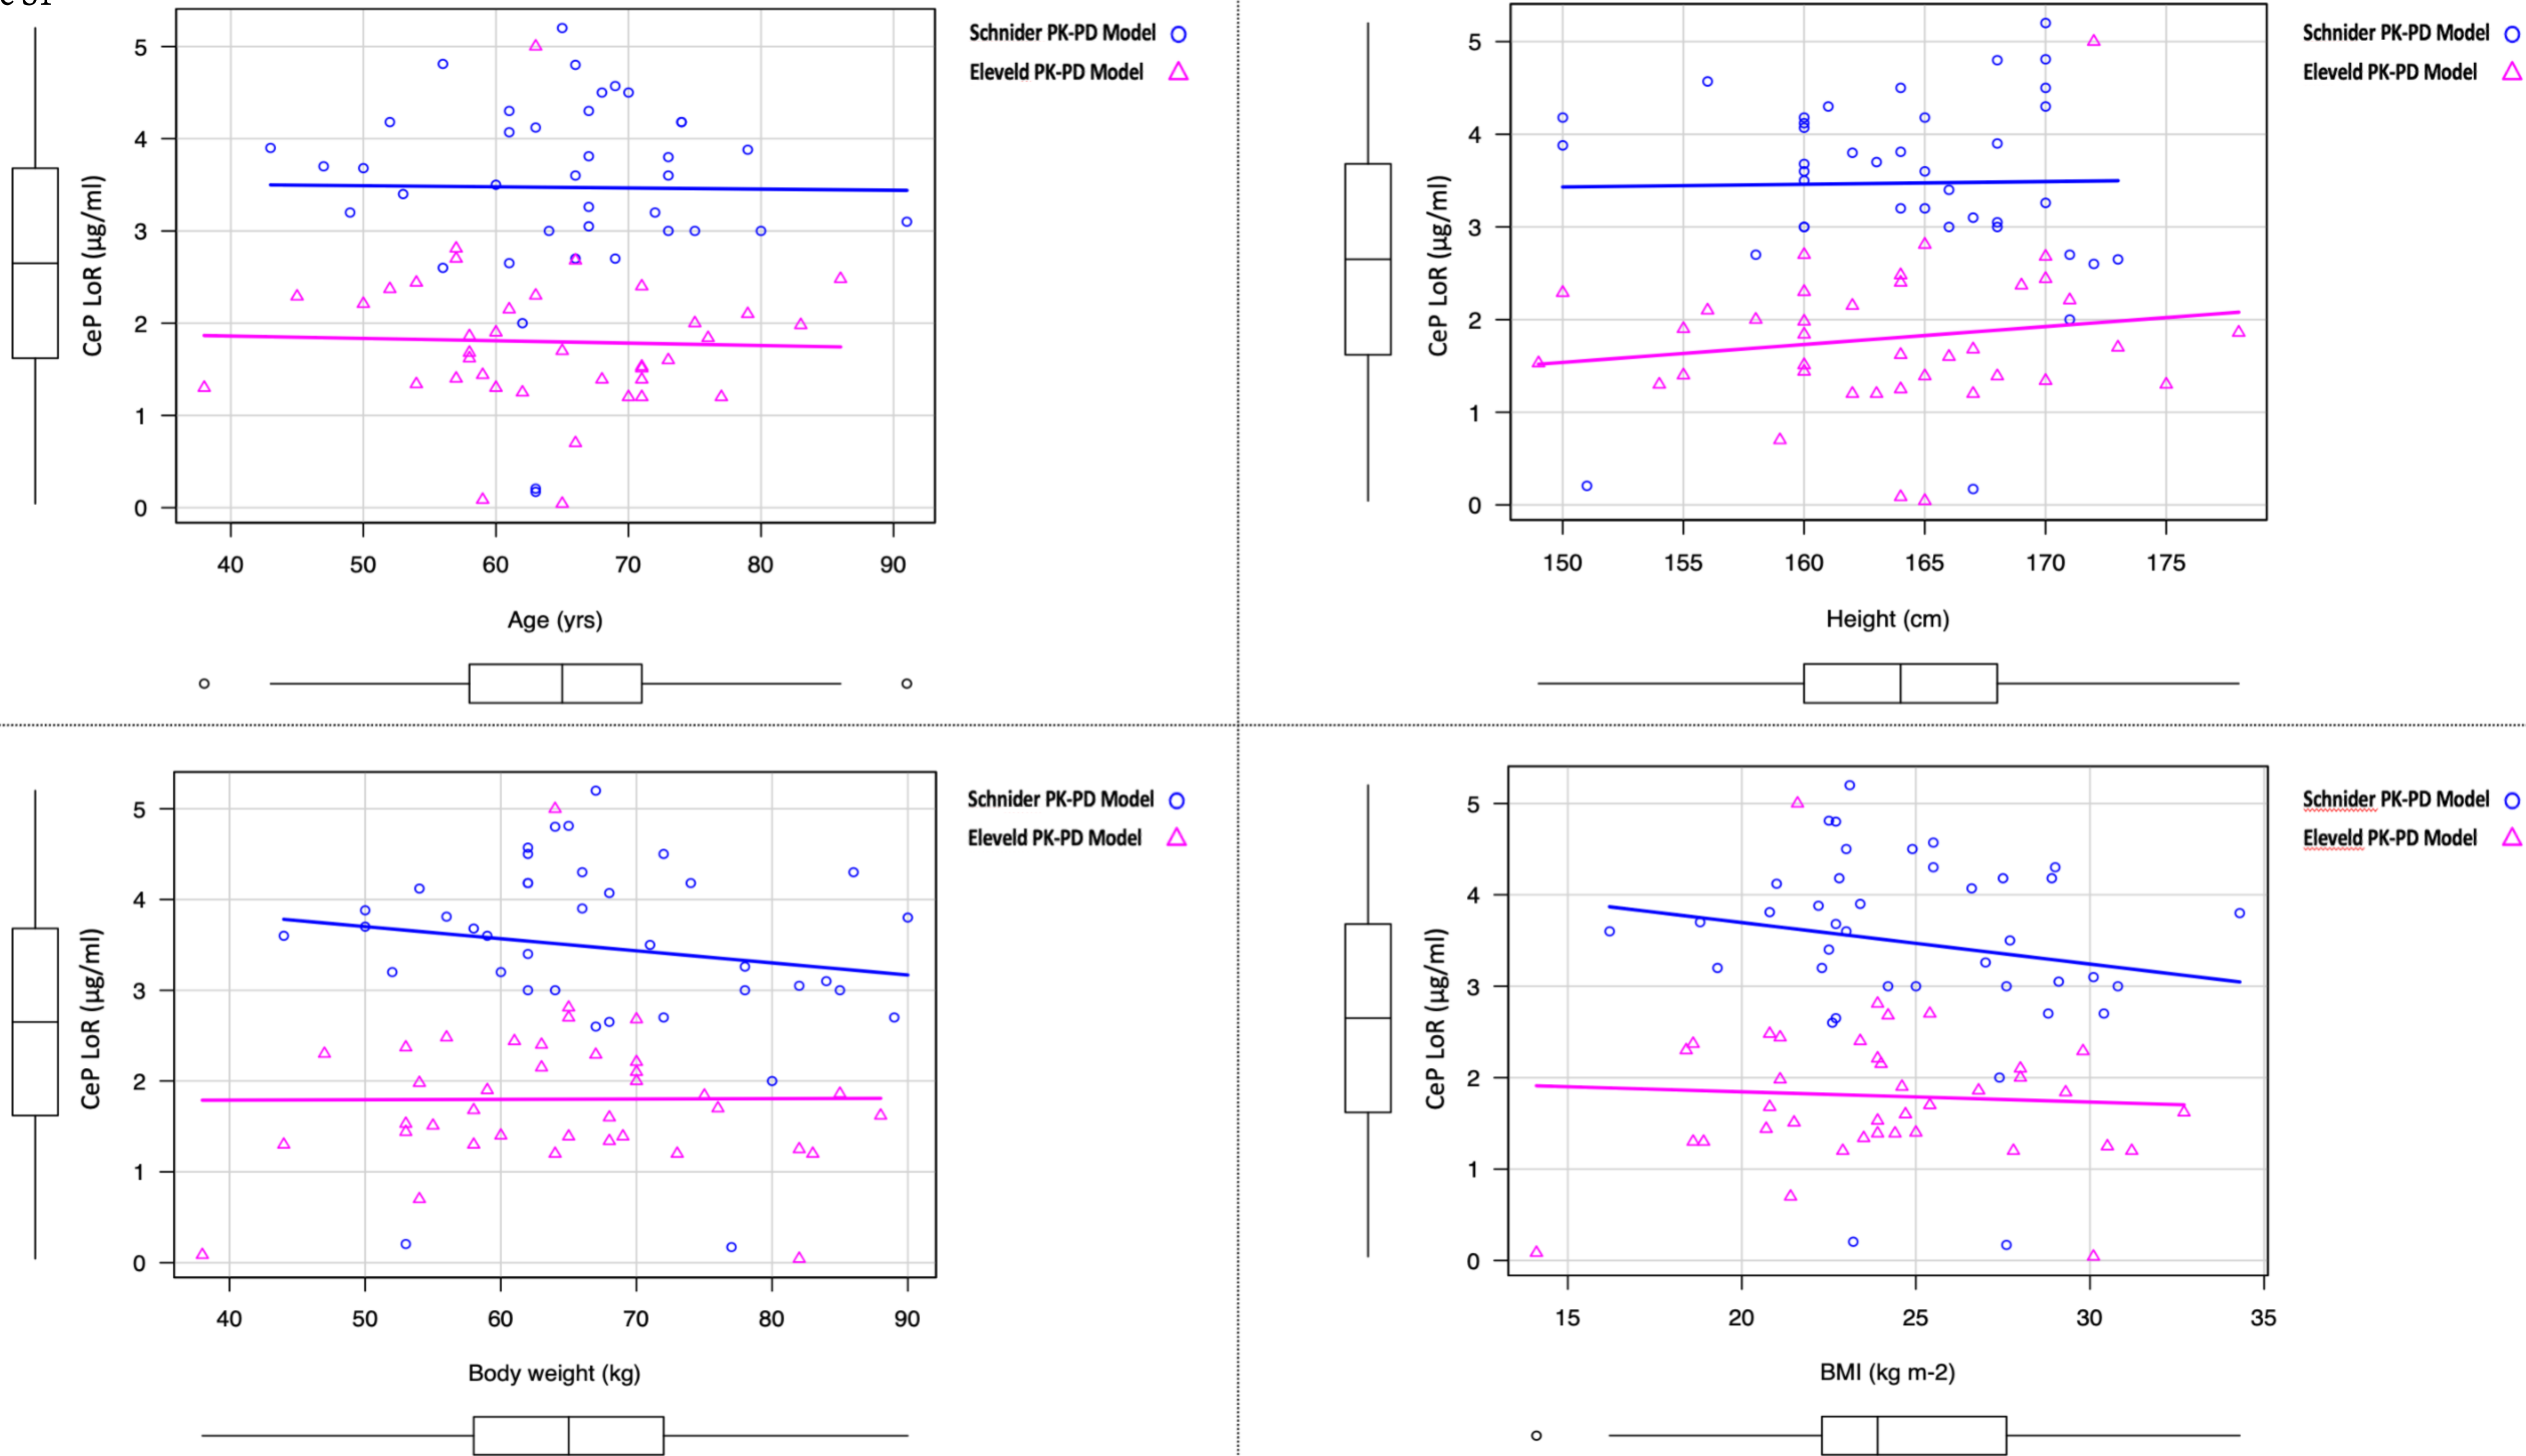

Figure S2

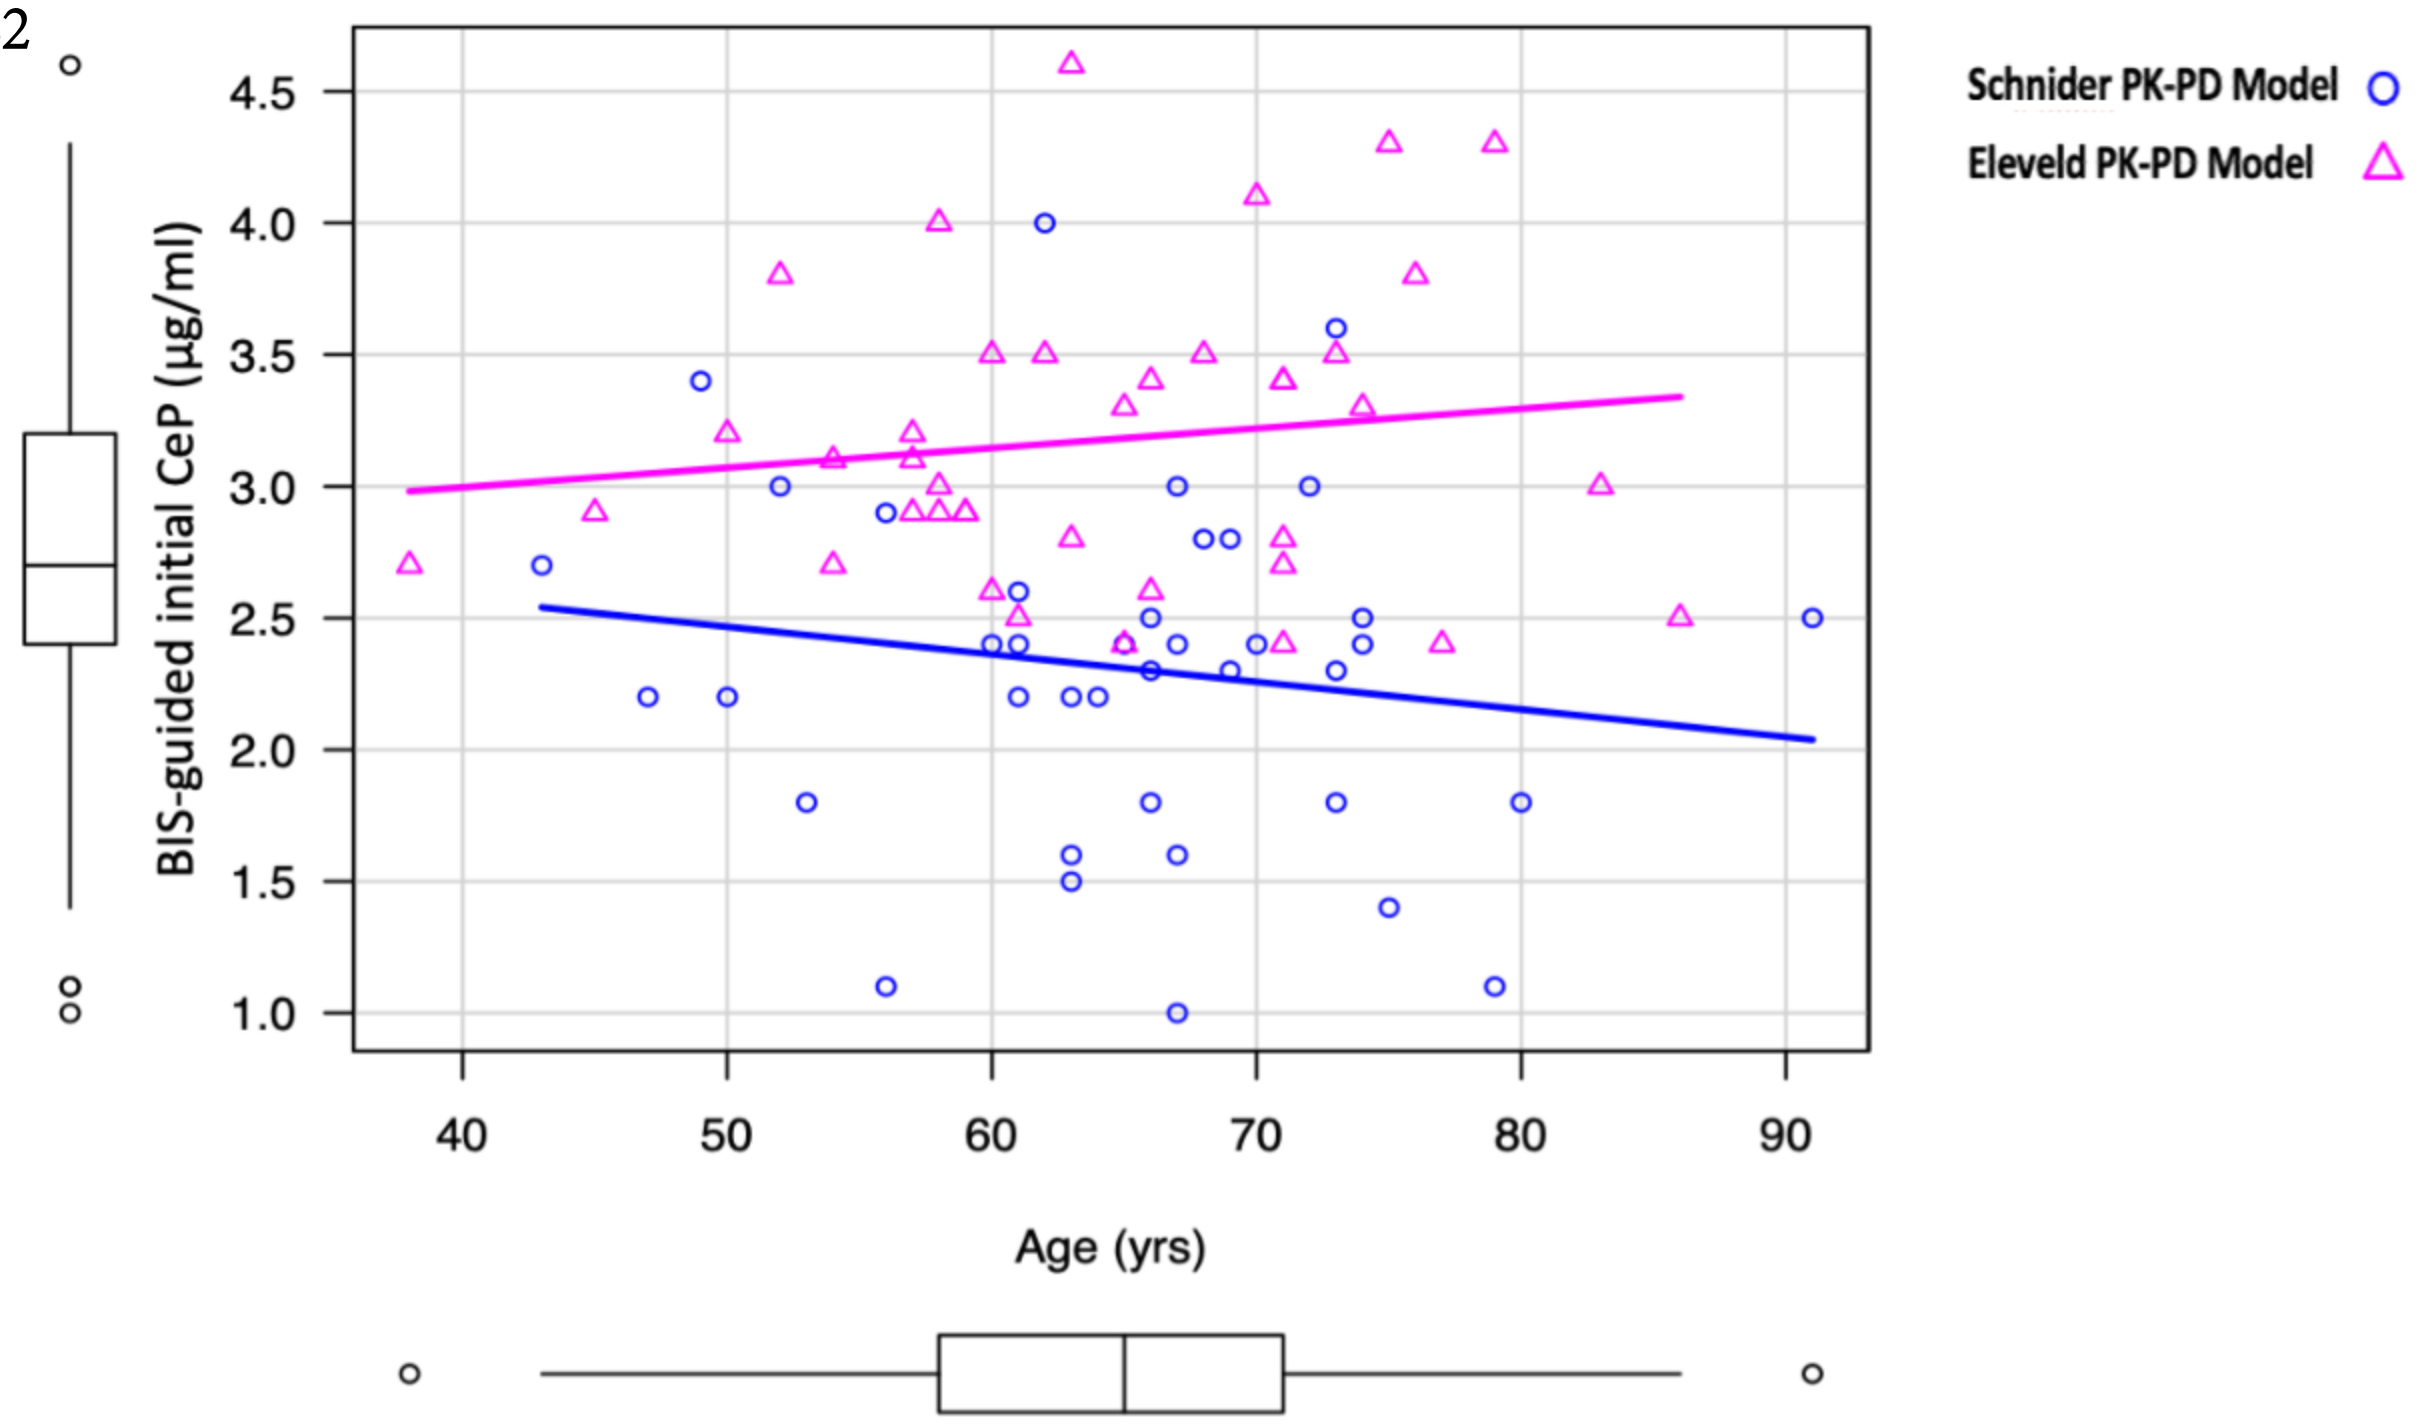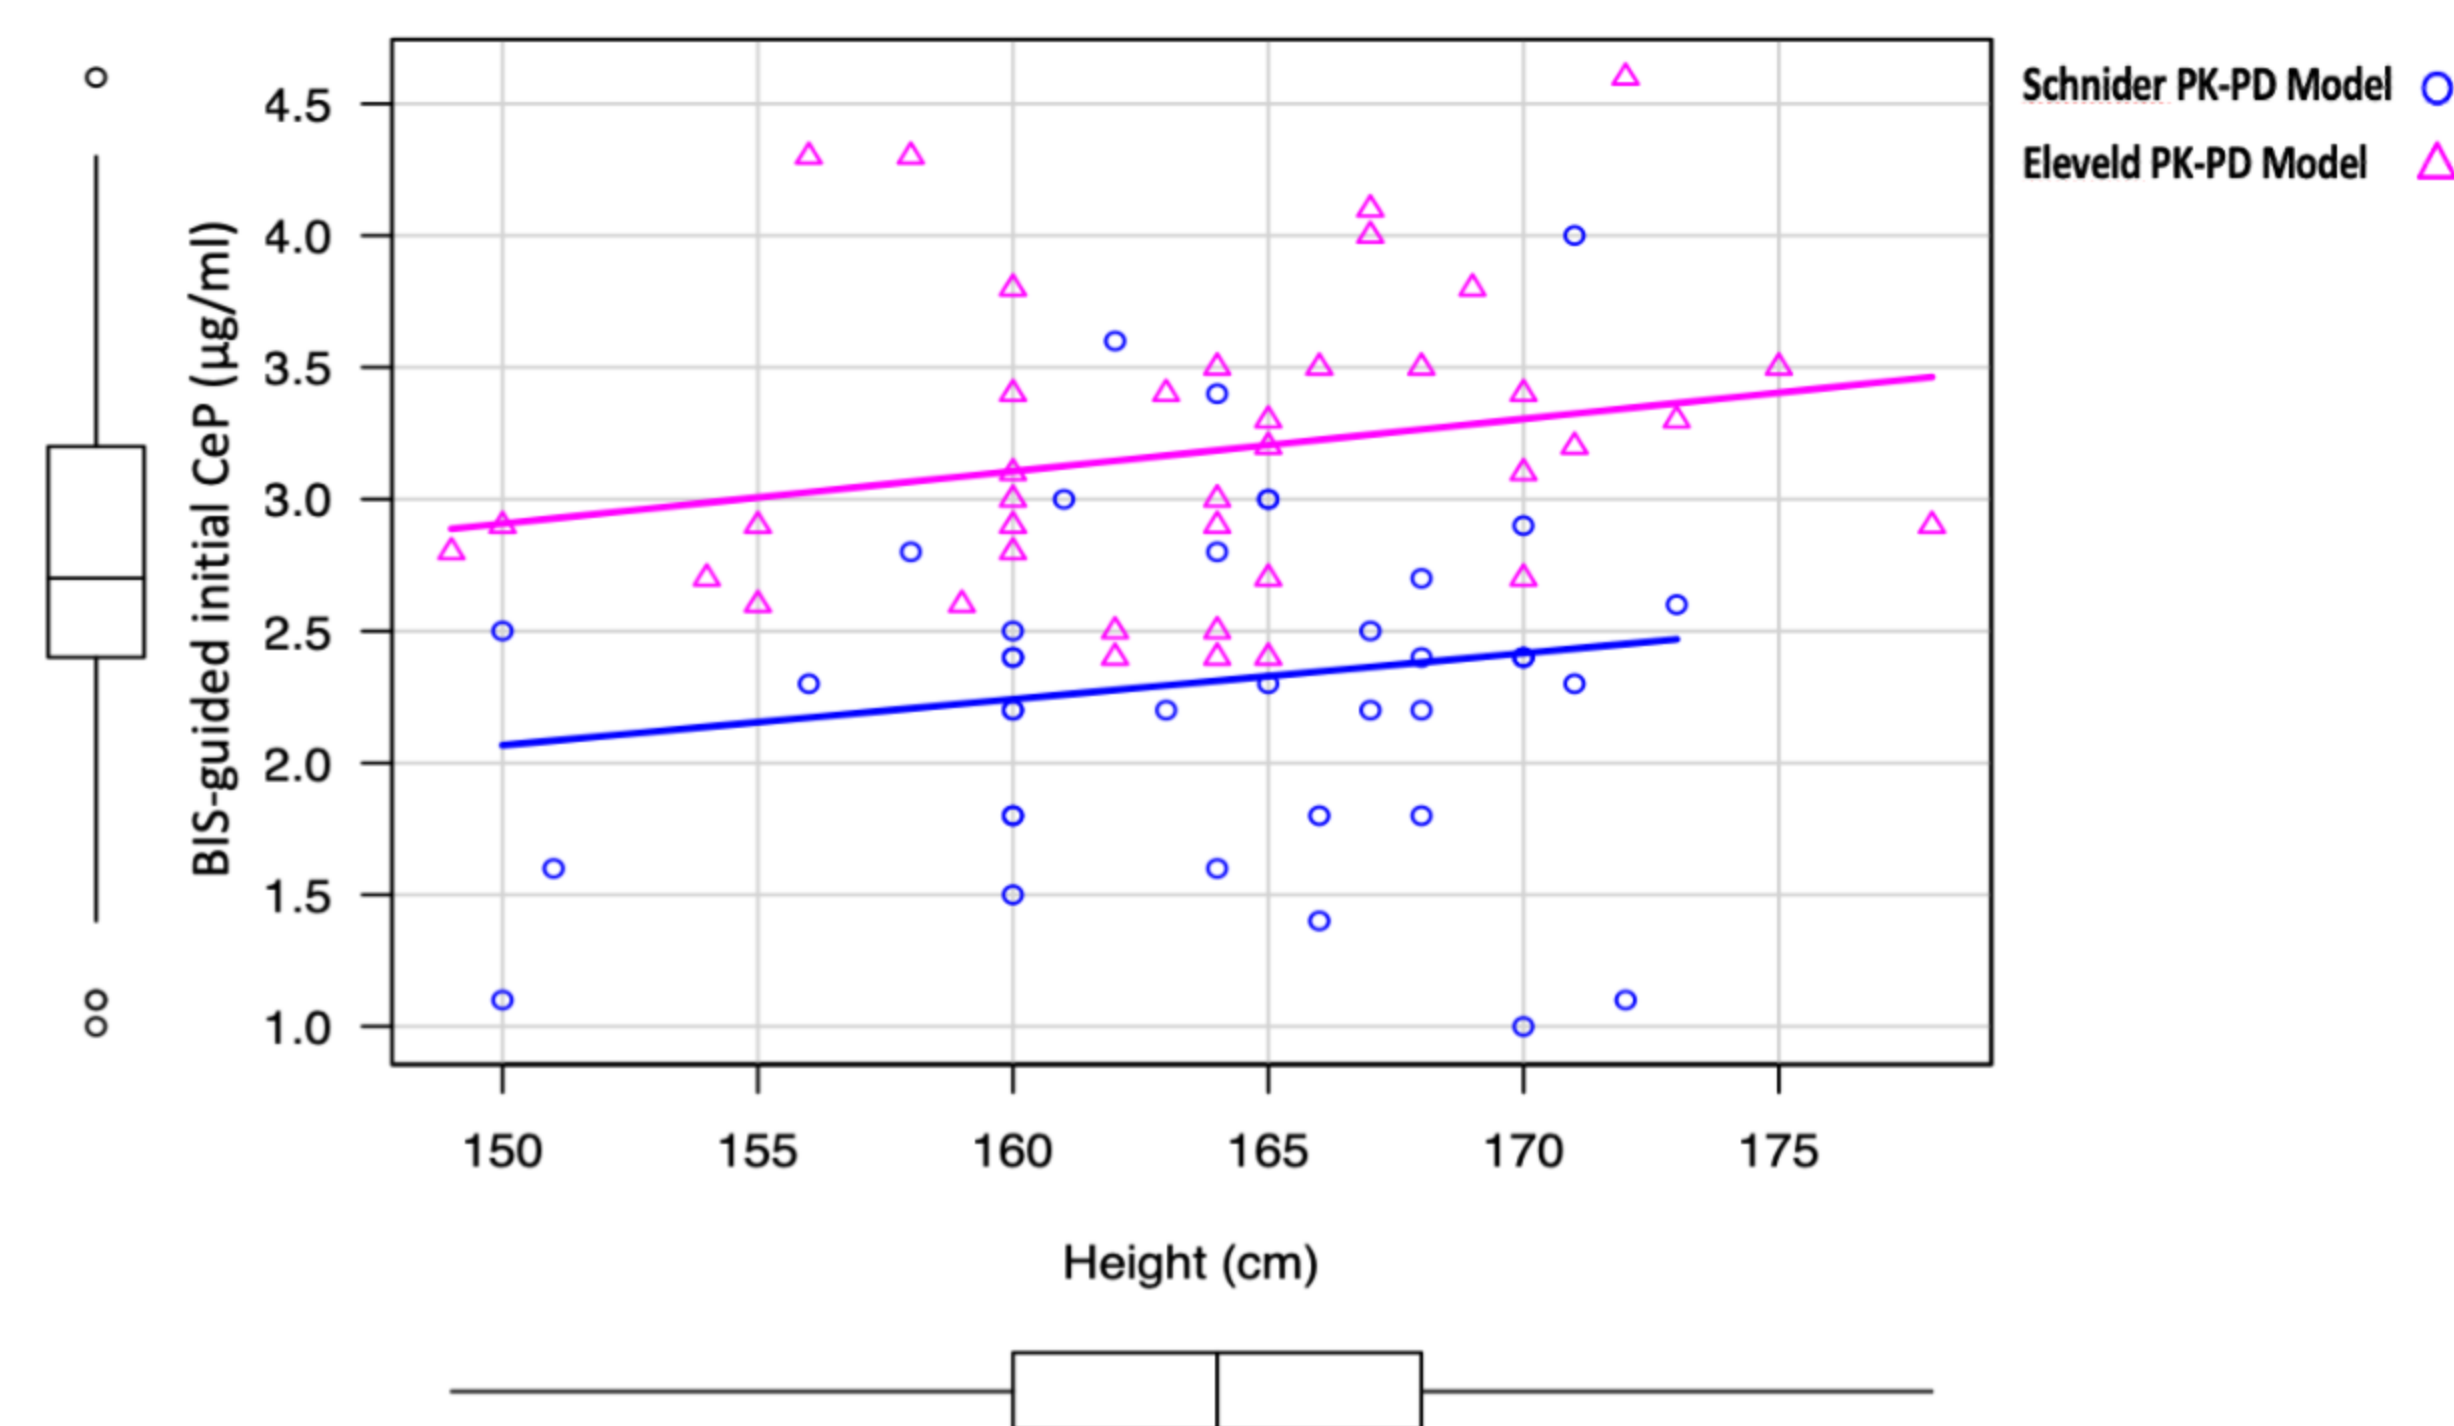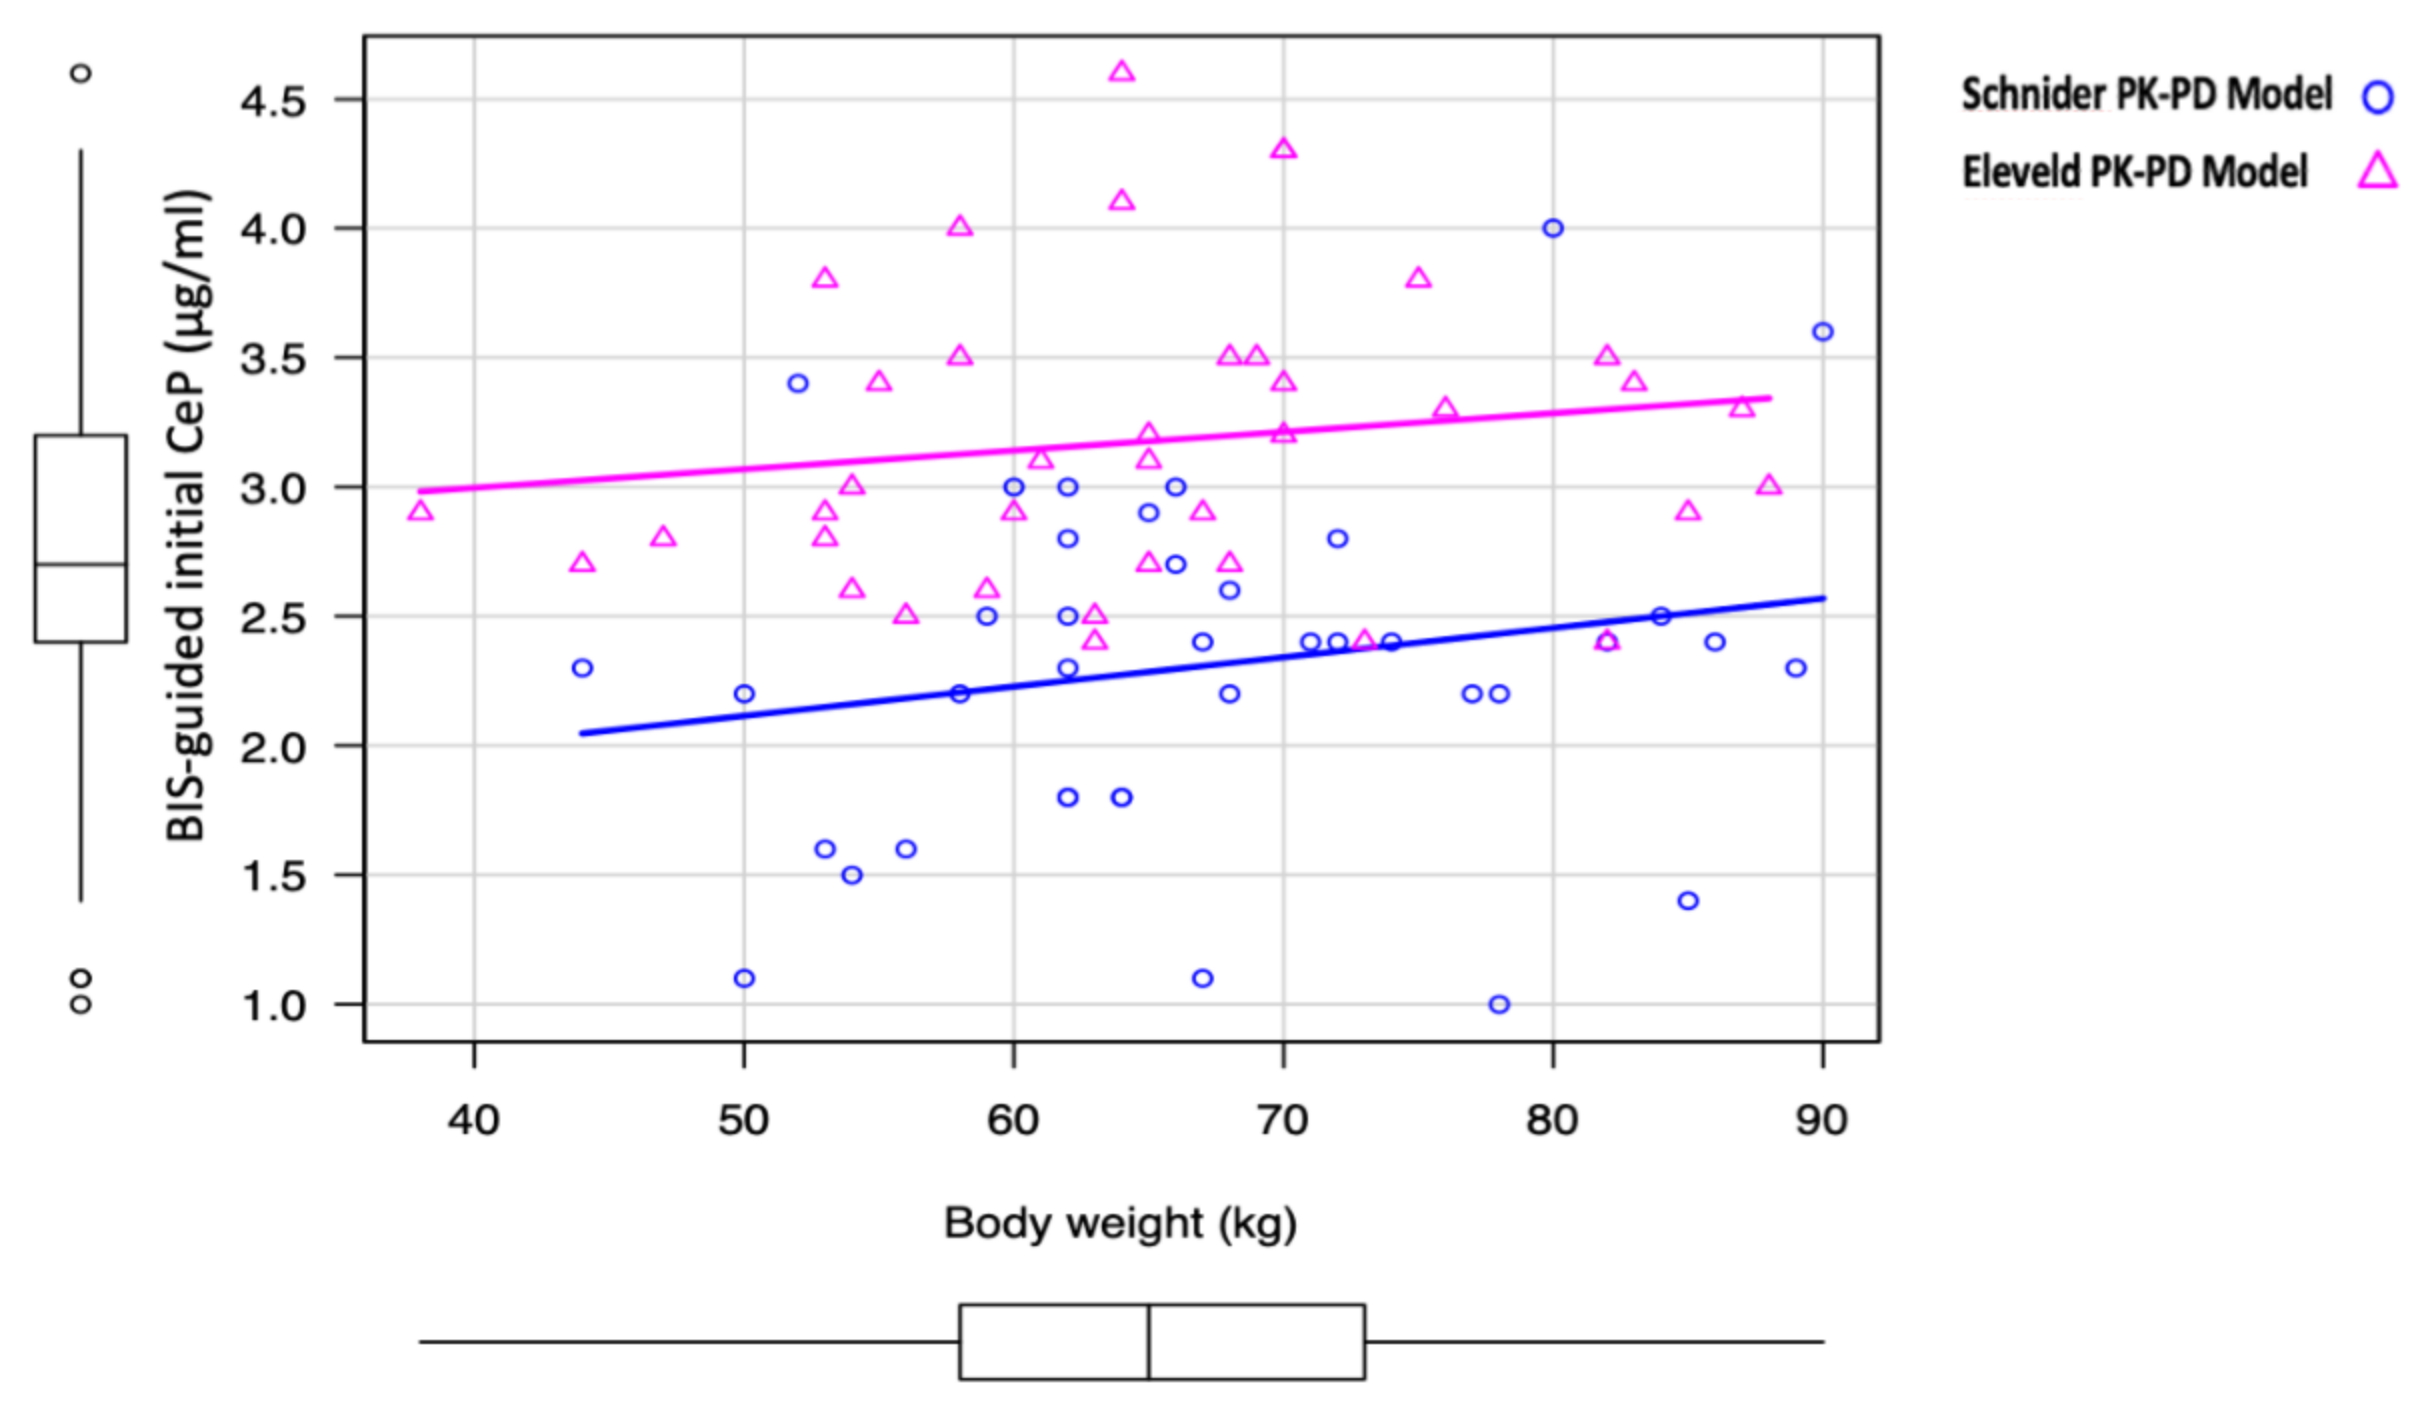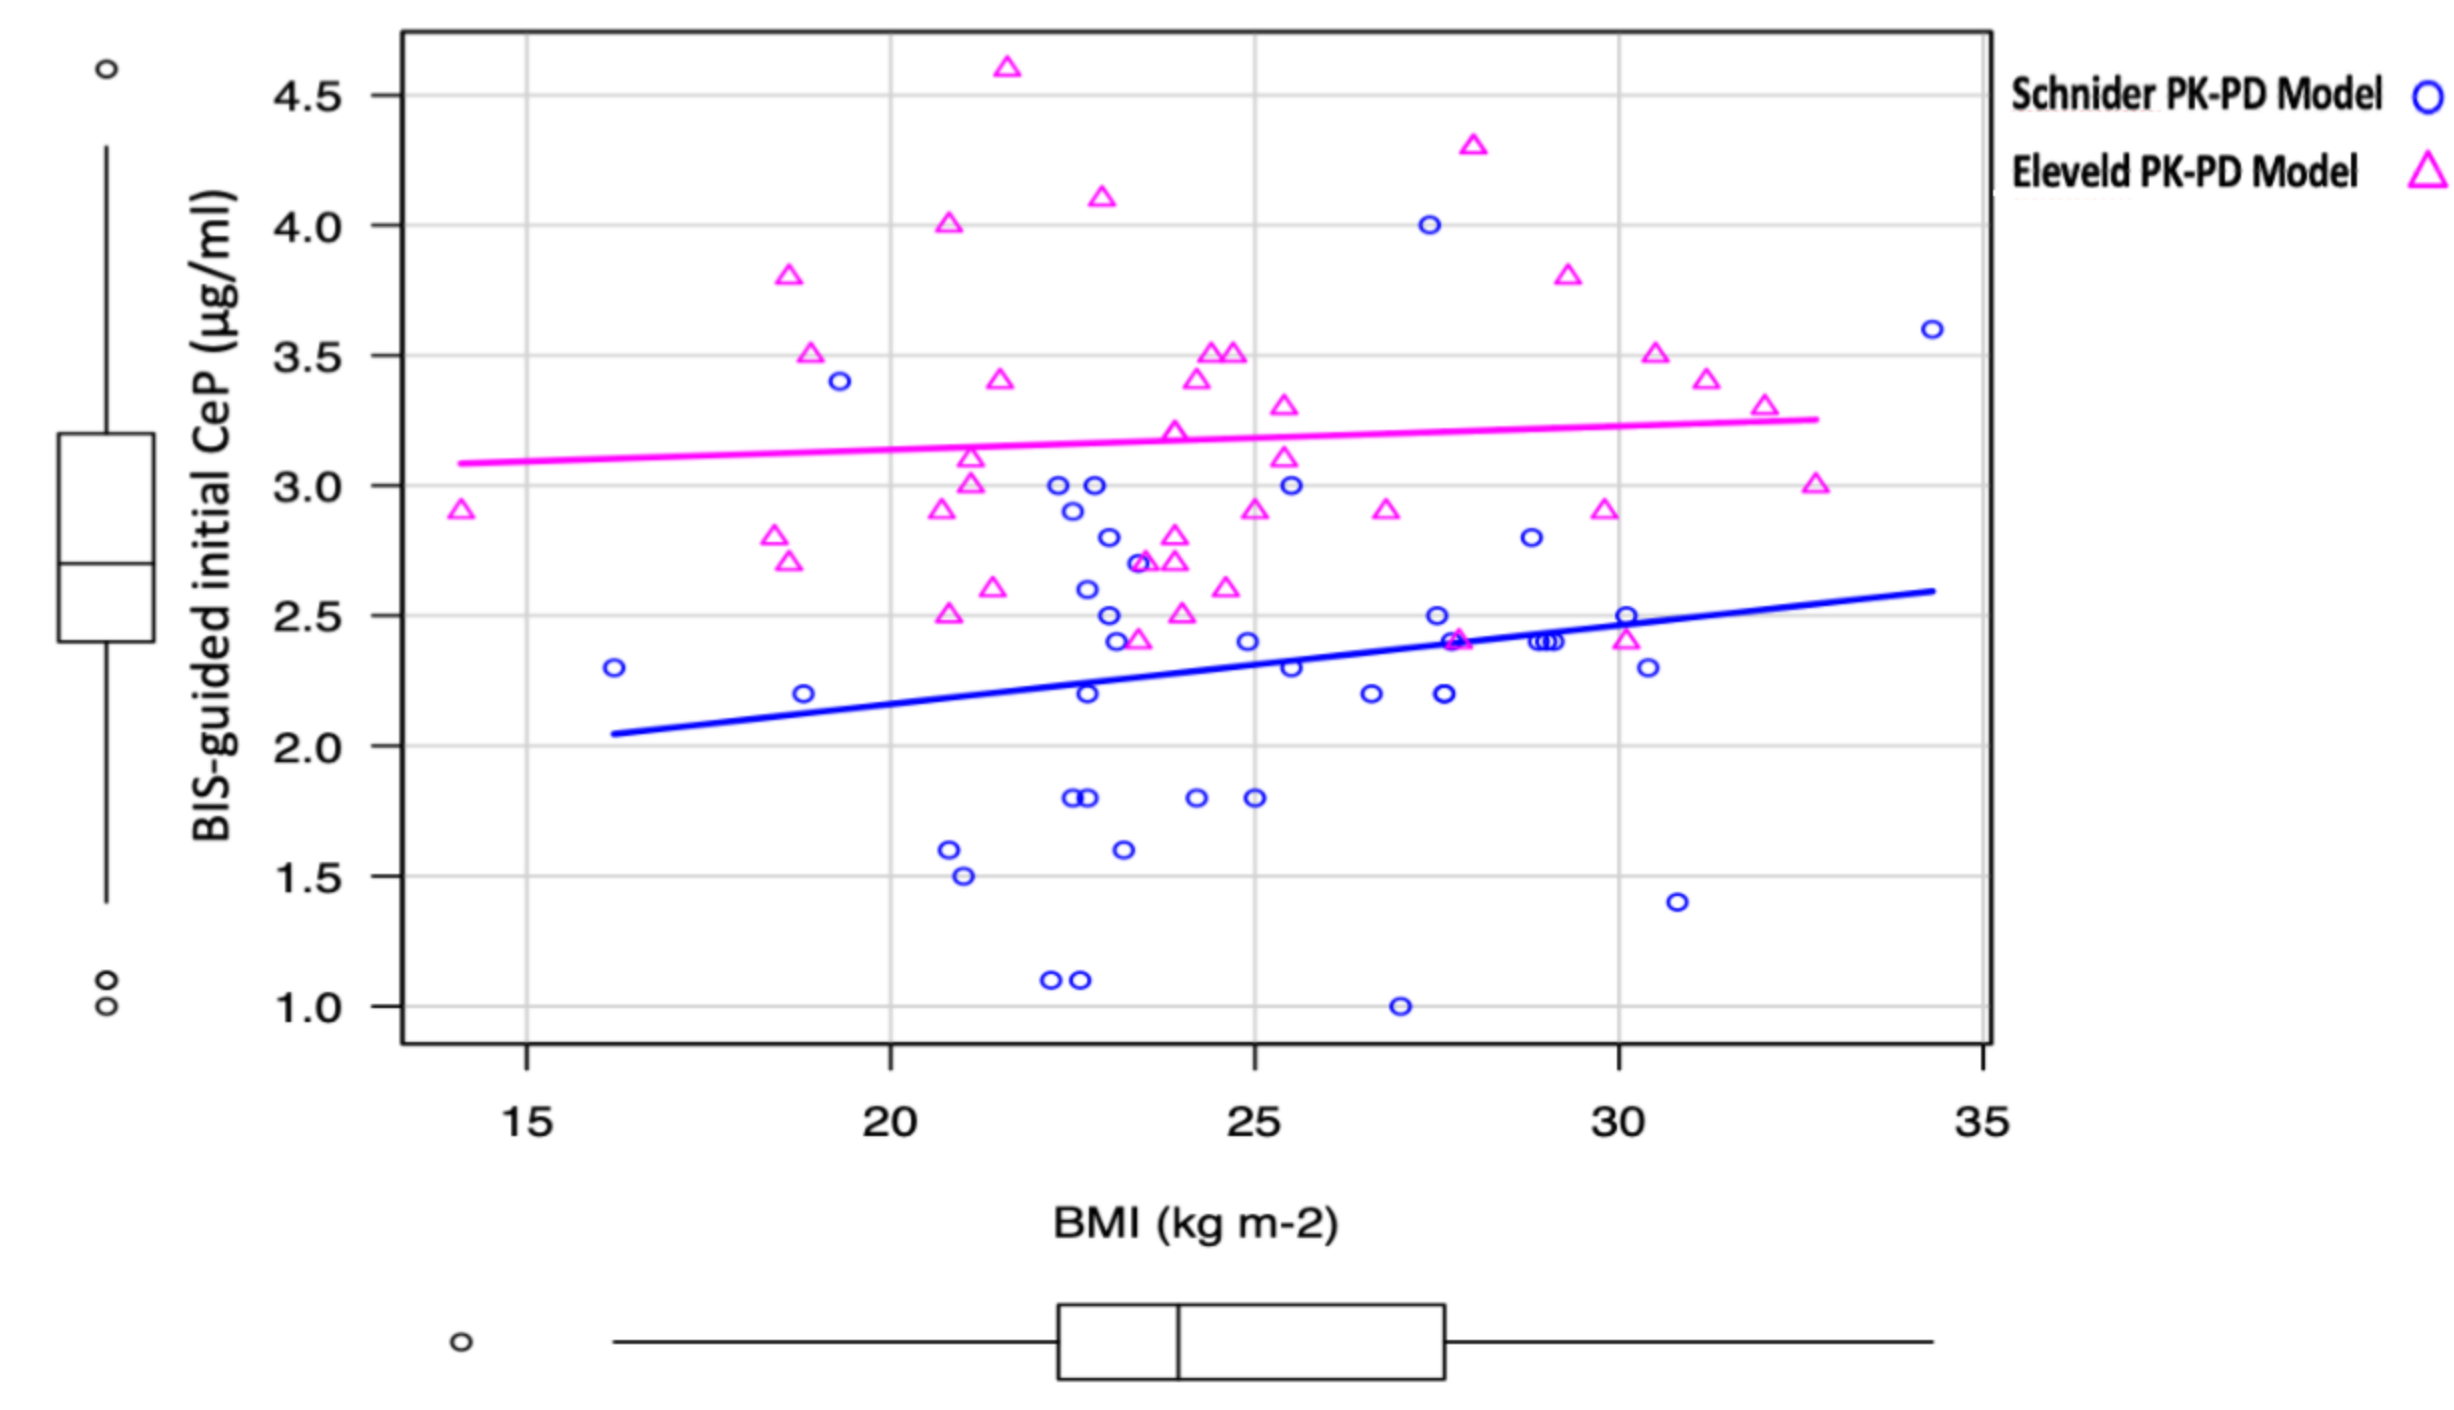



Figure S3

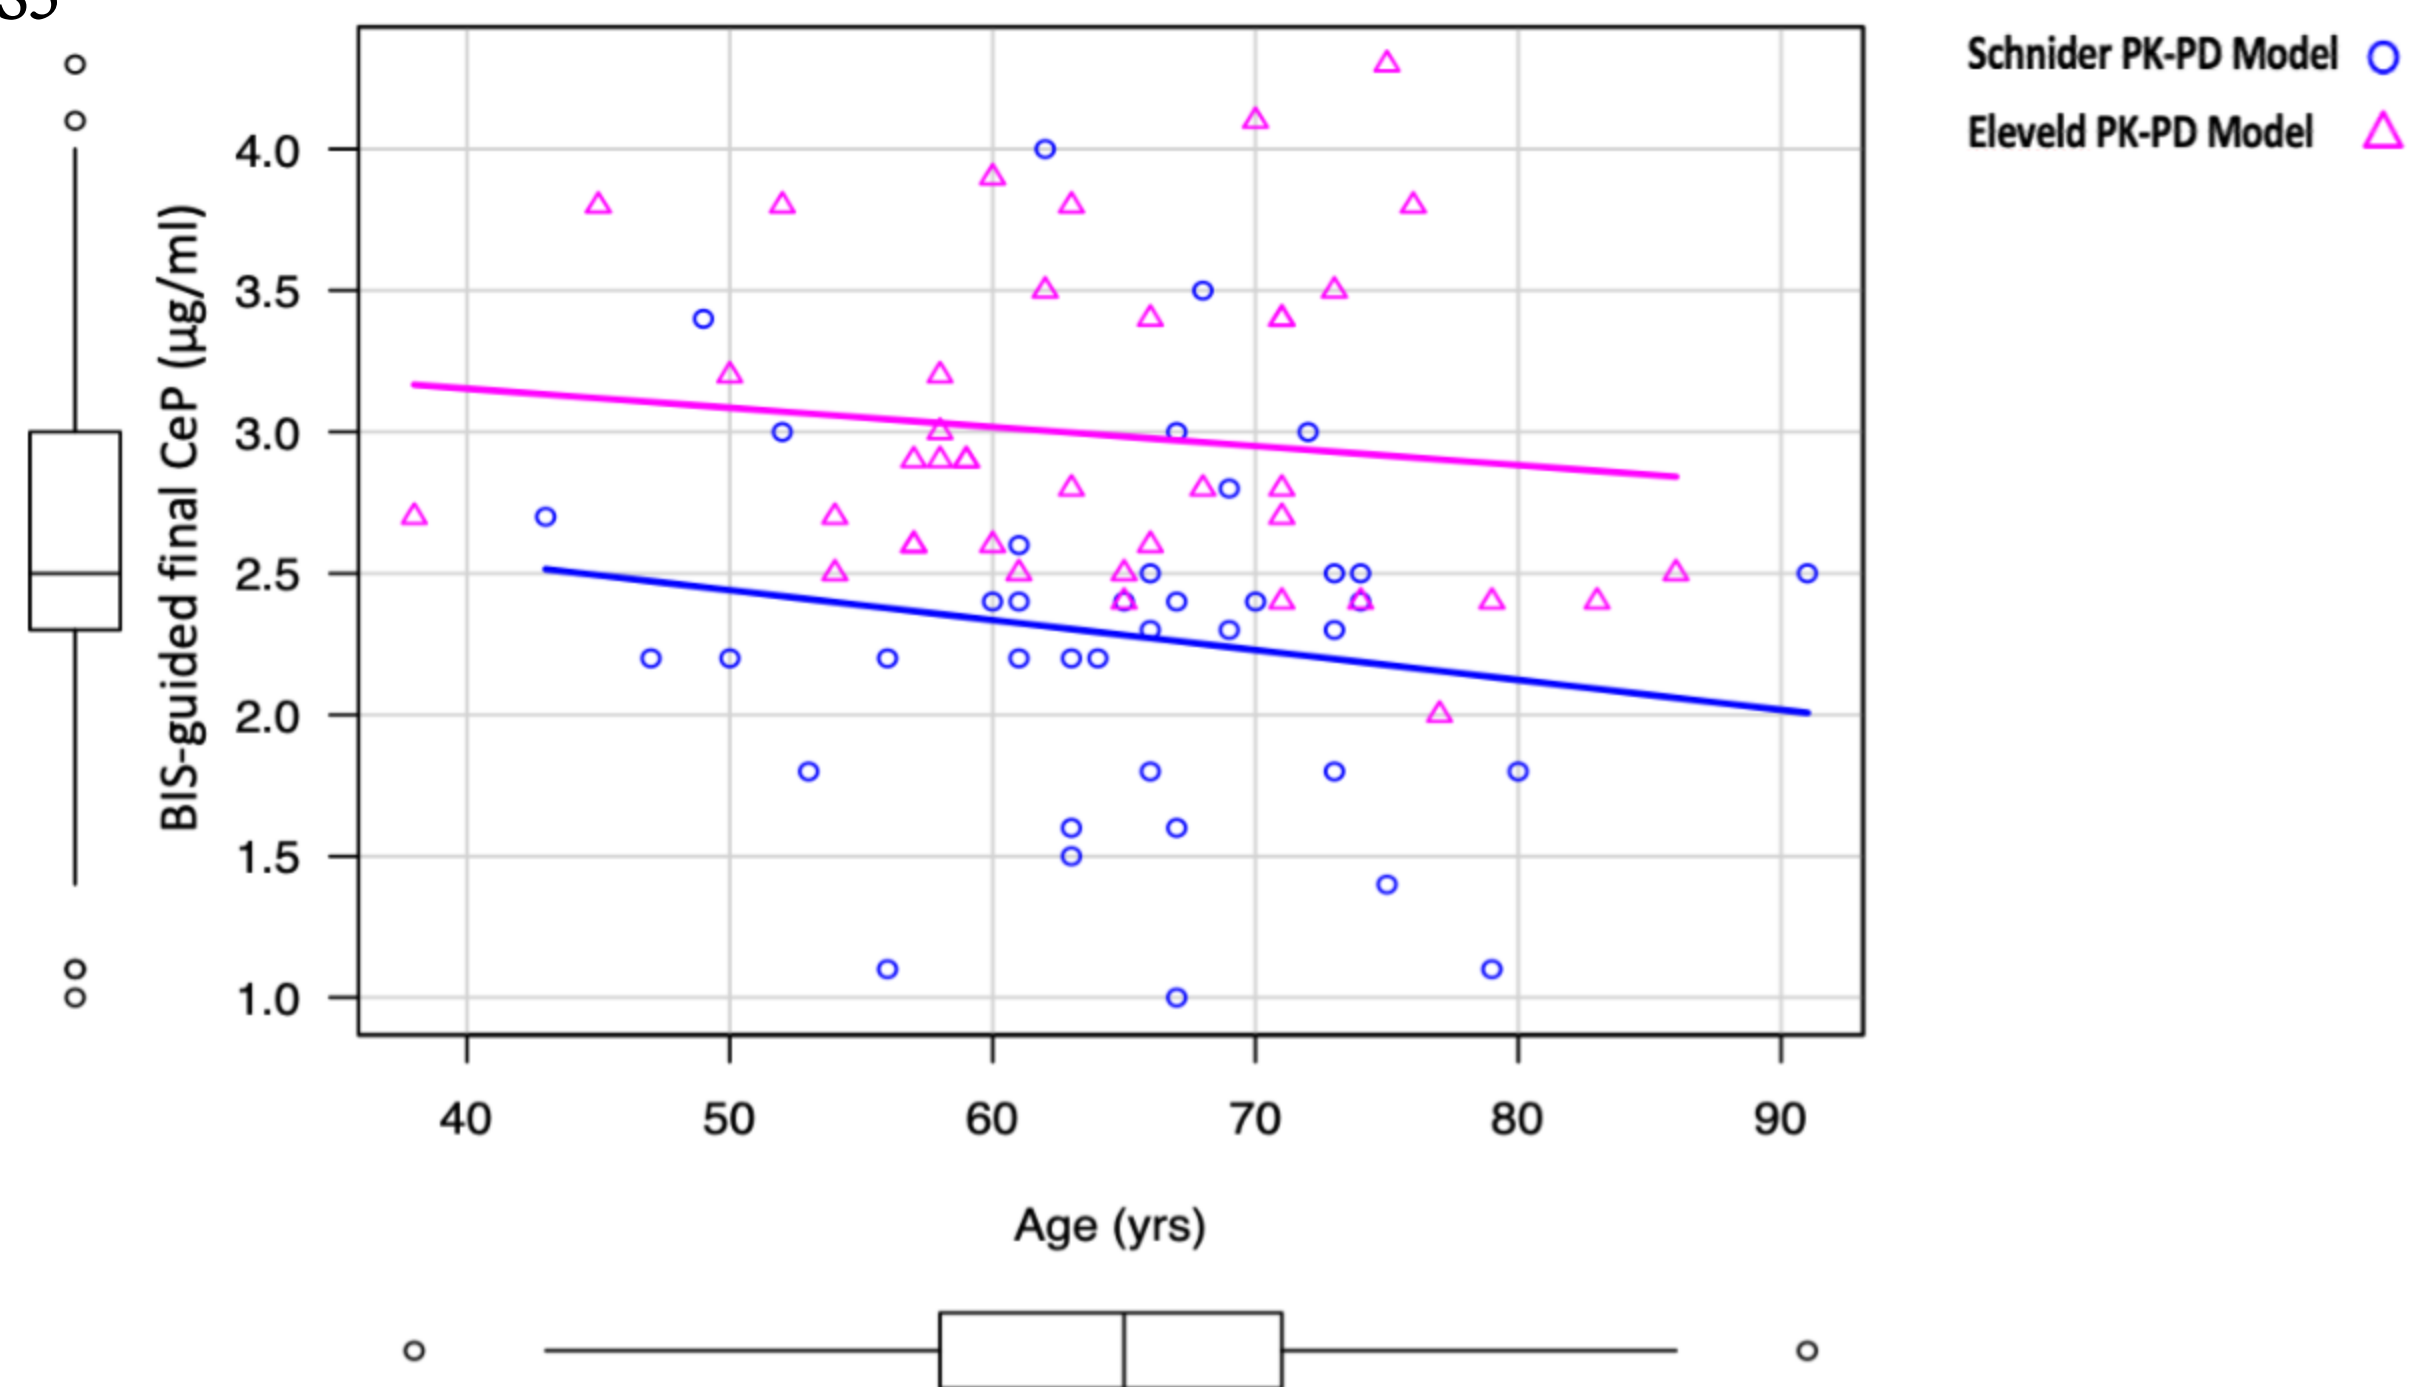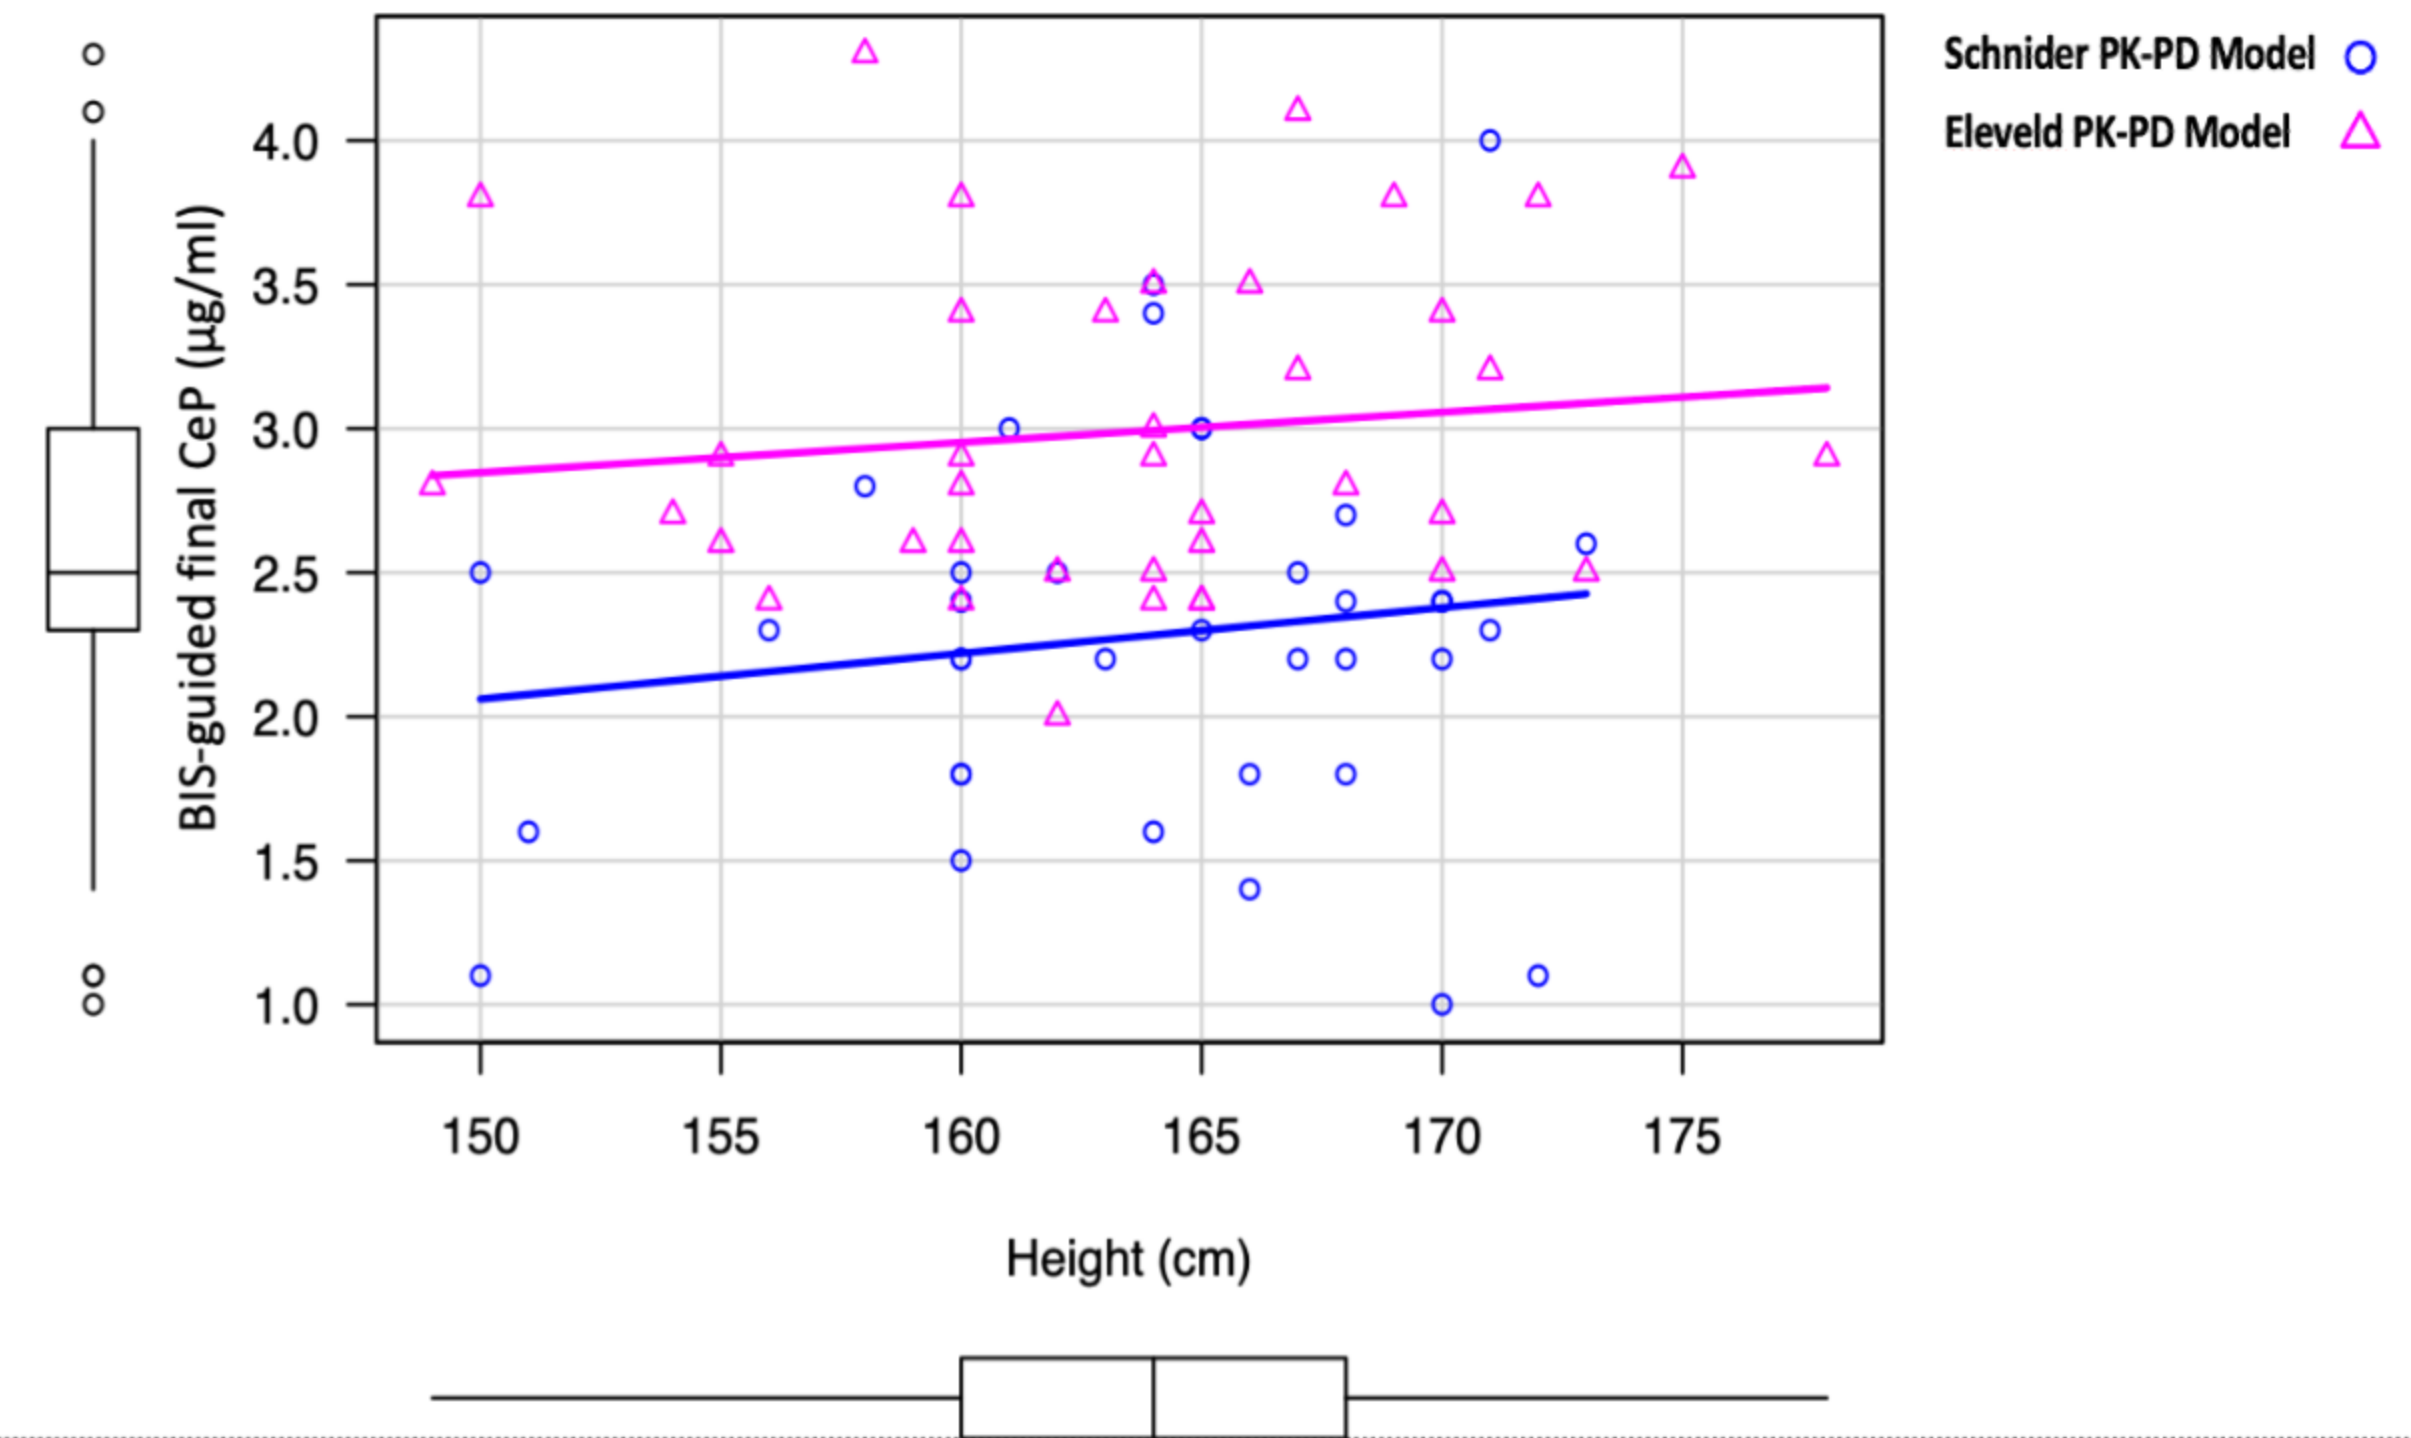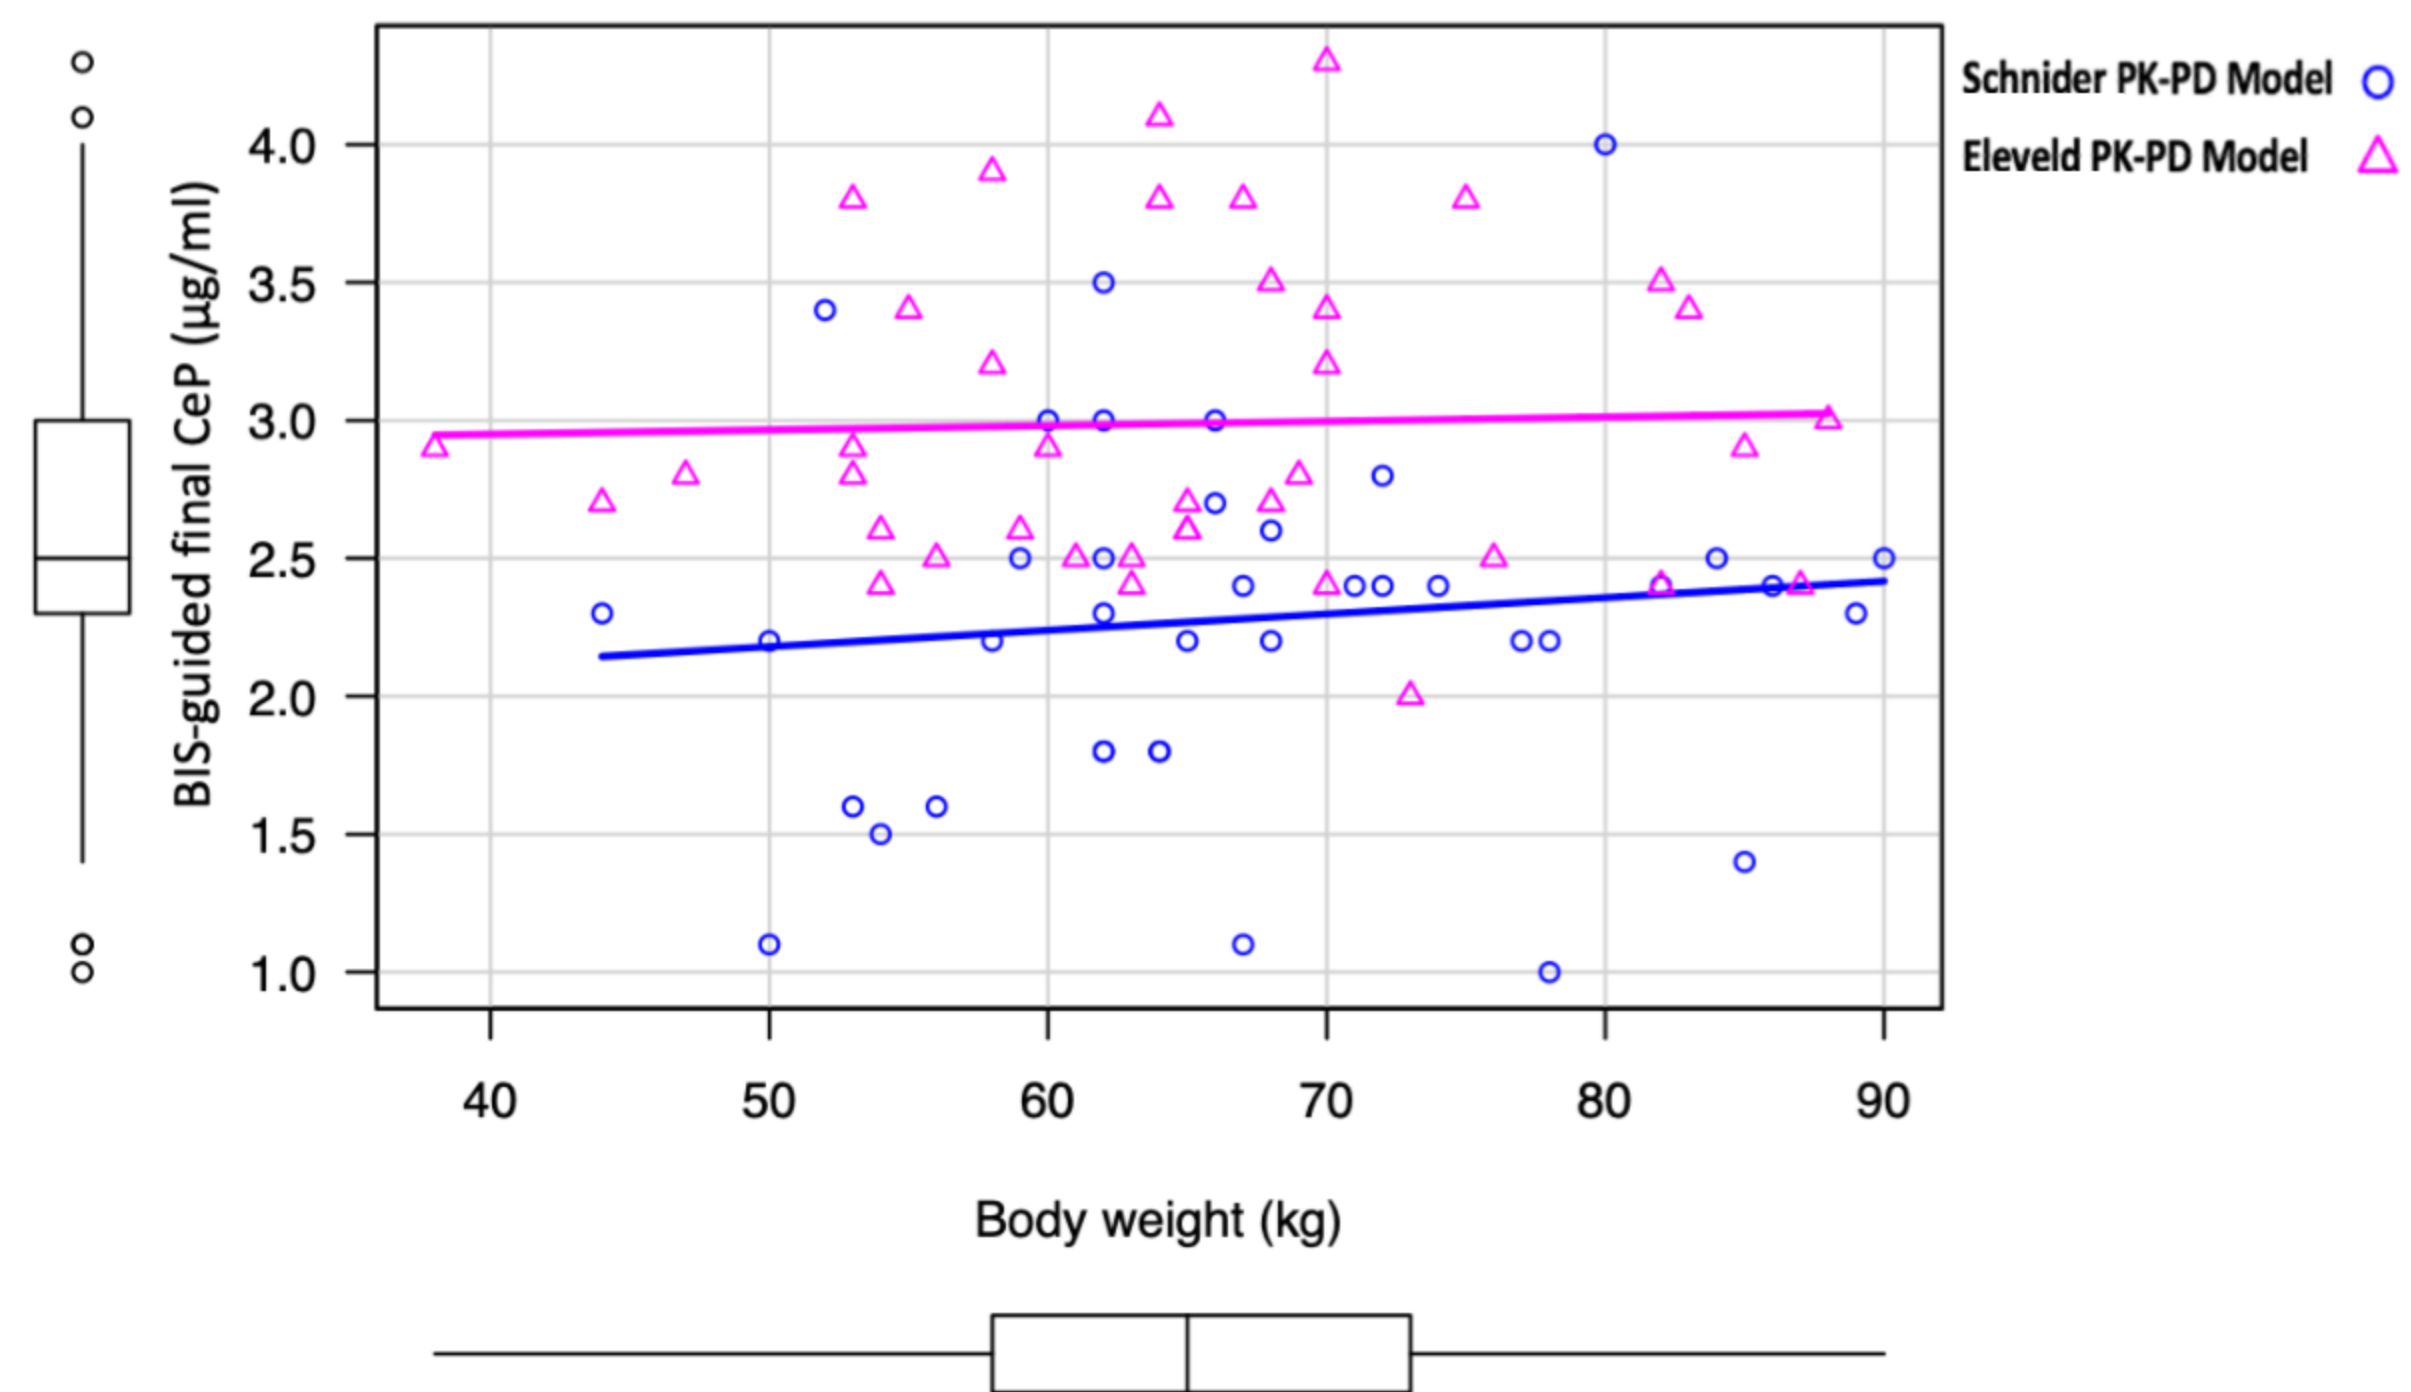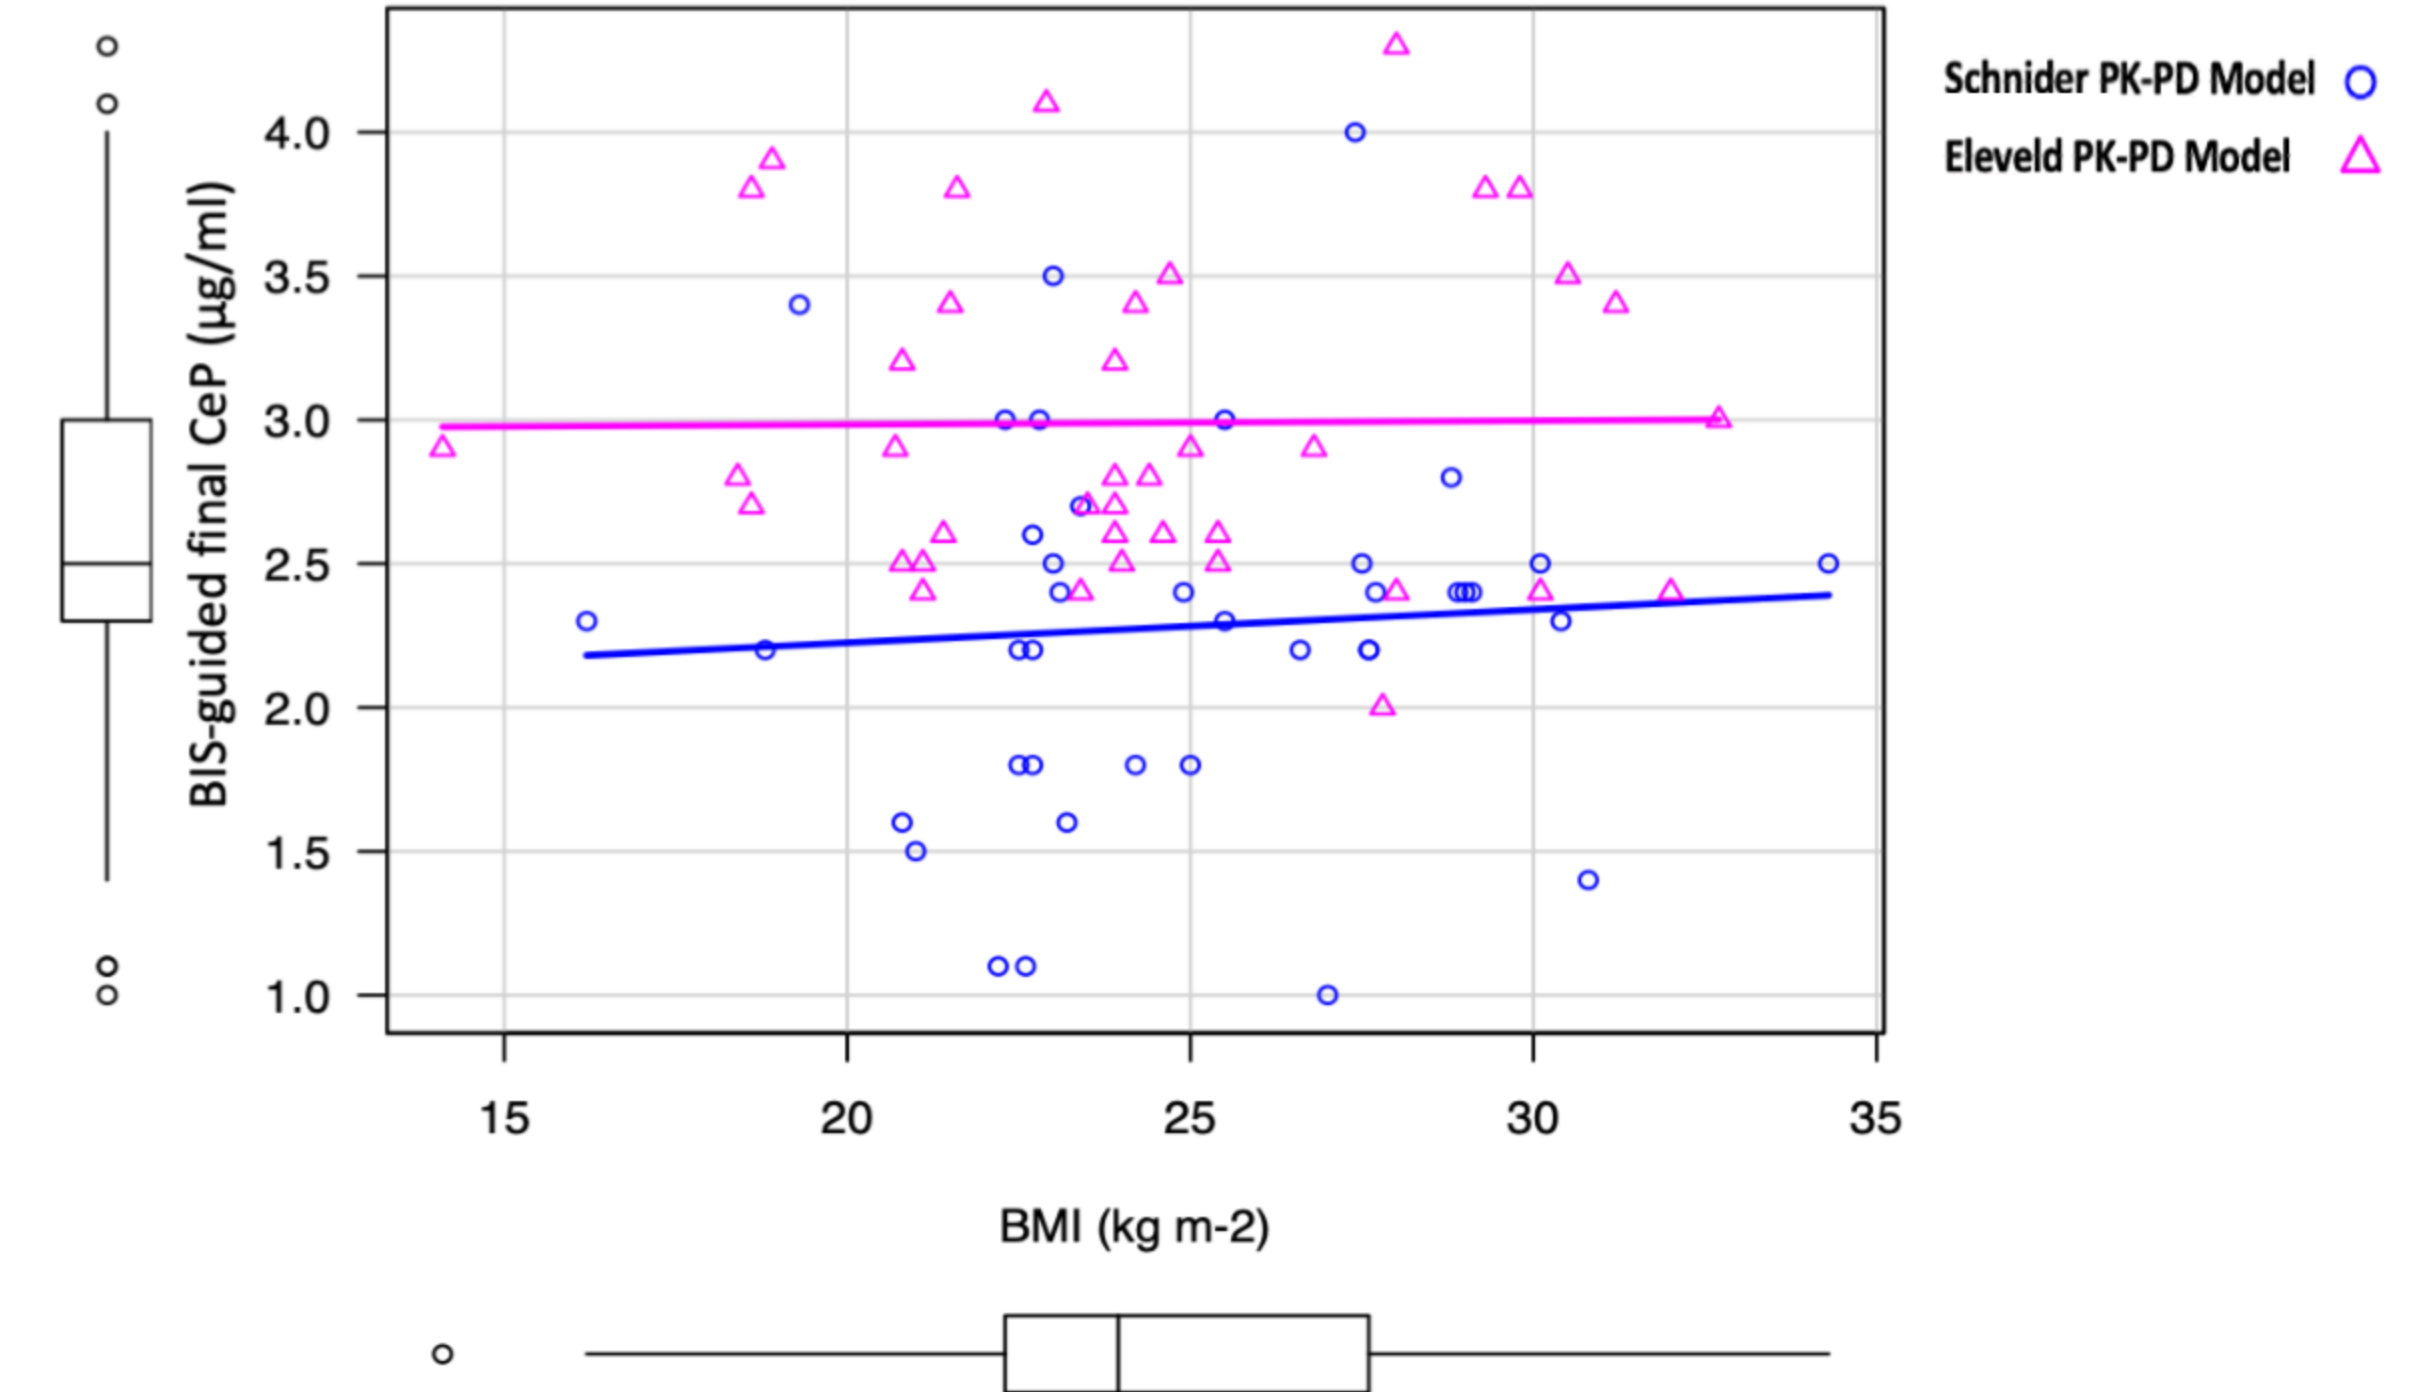

Figure S4

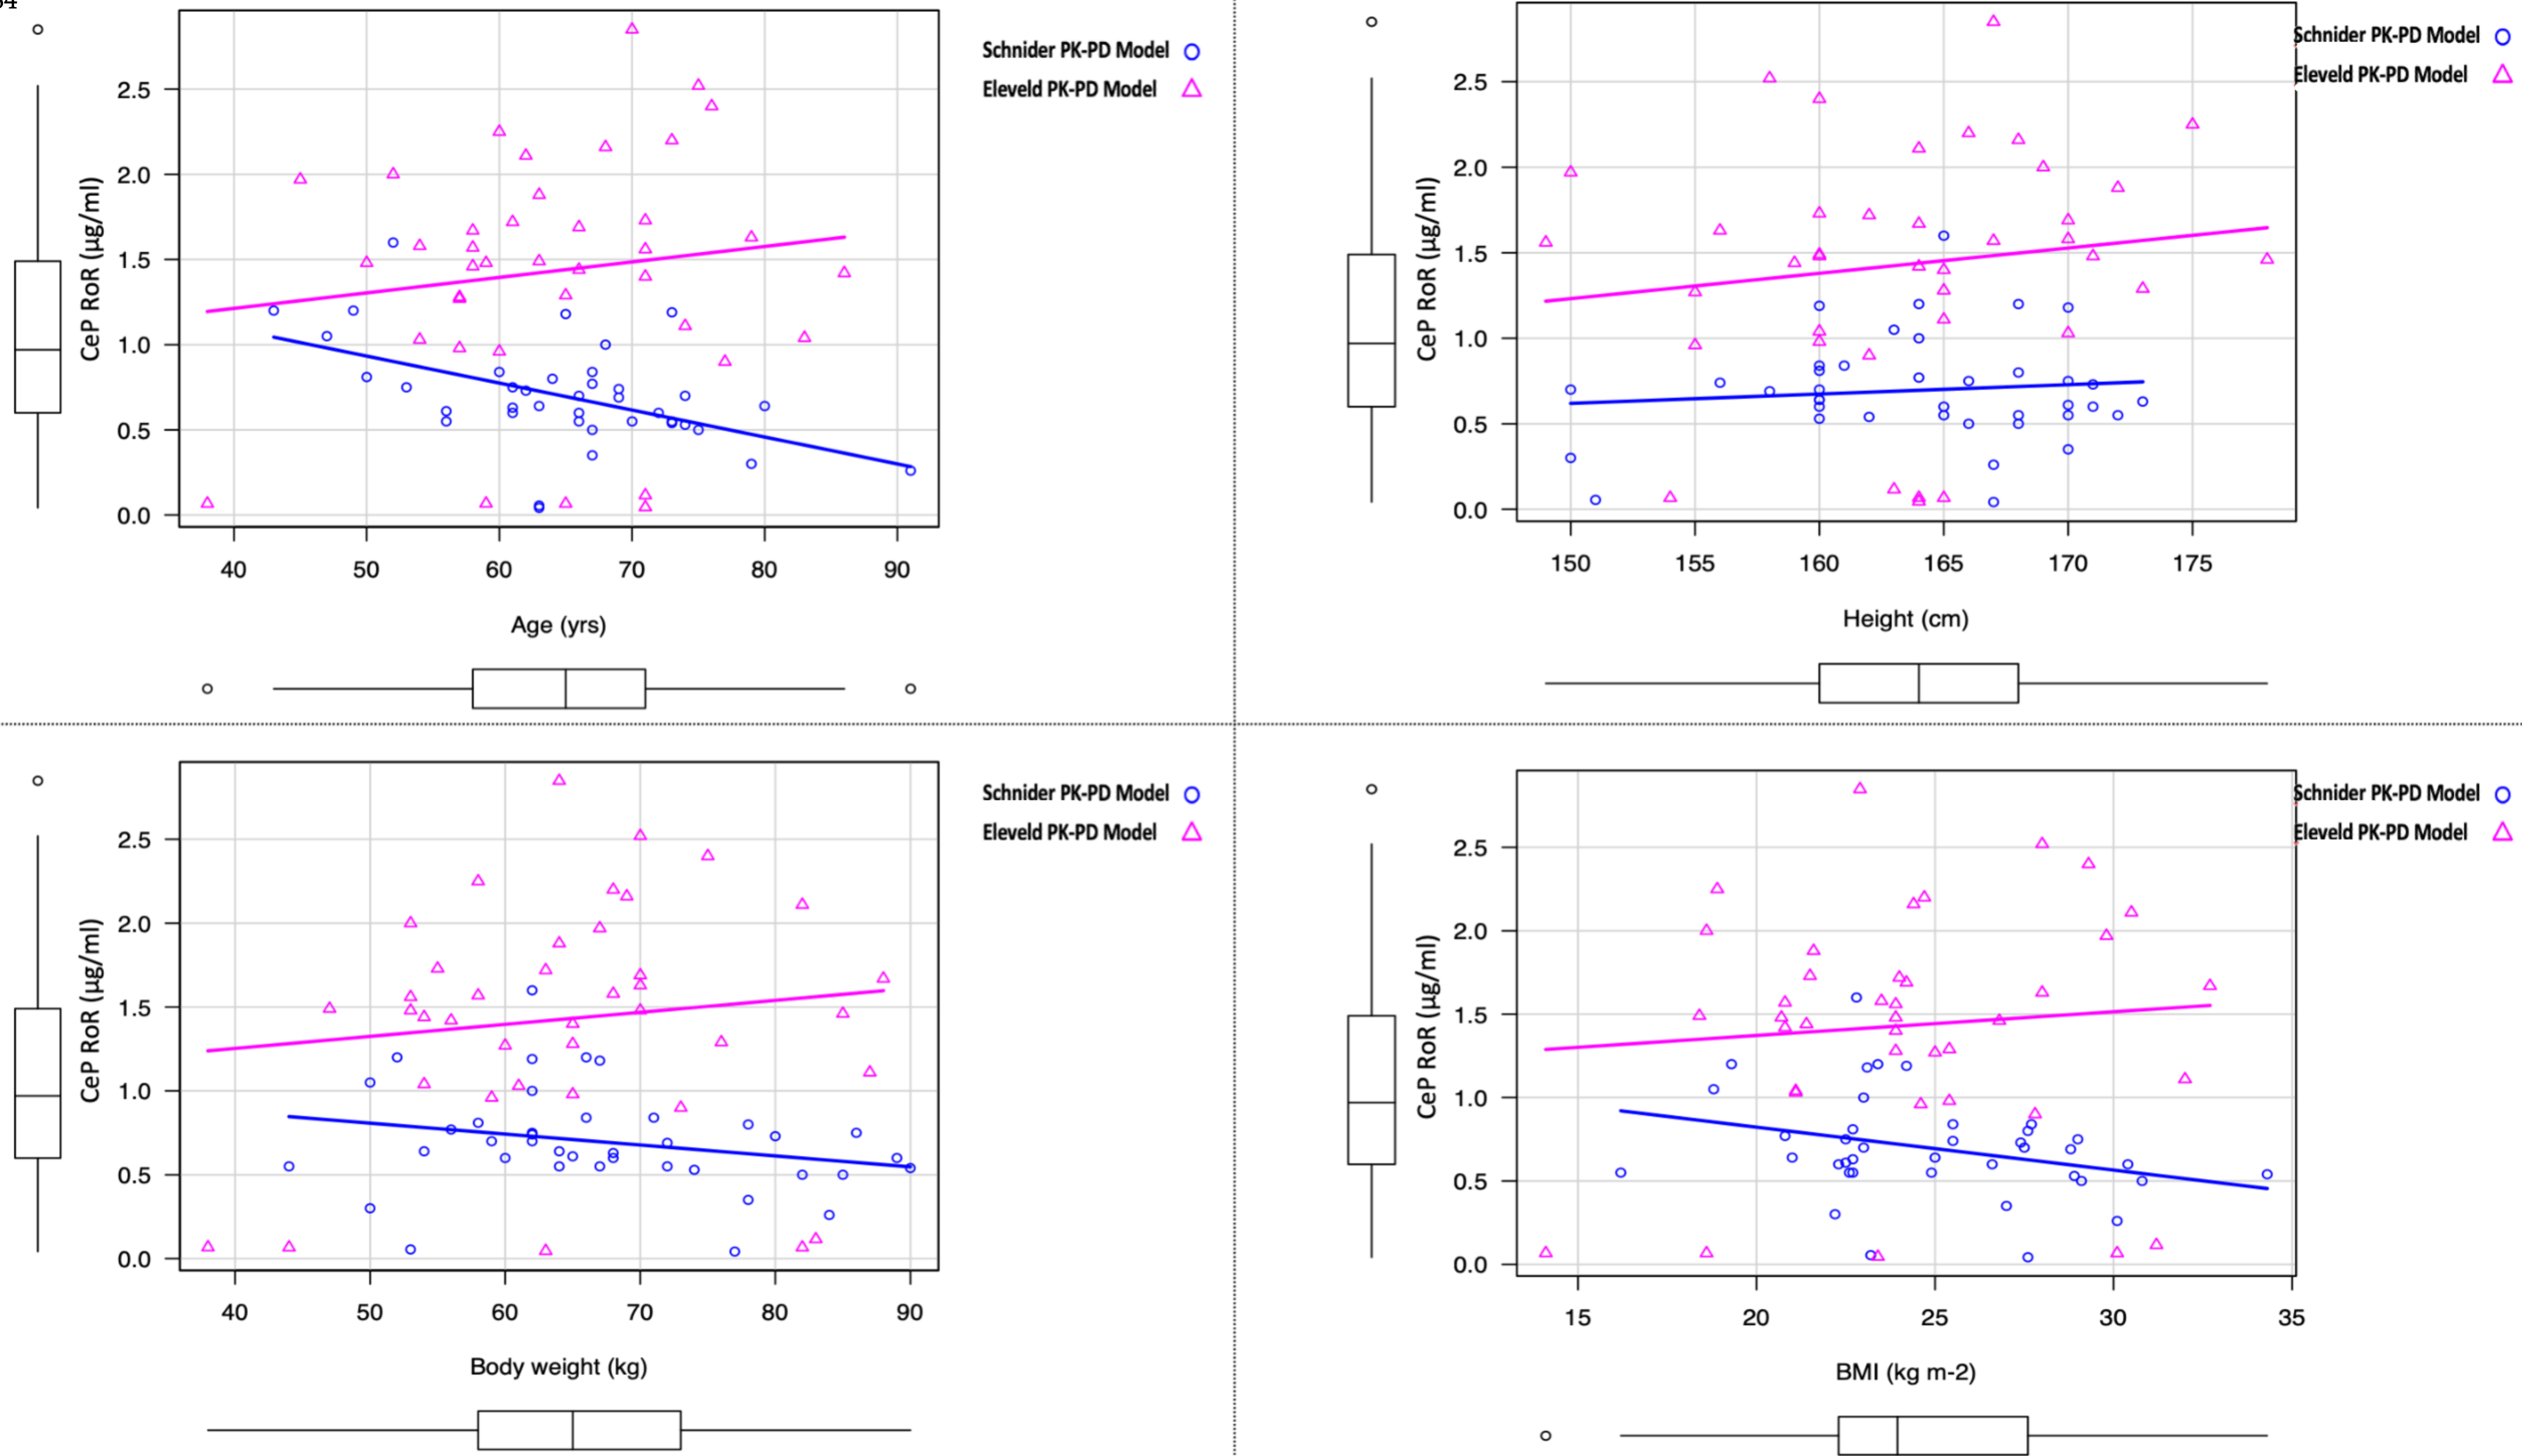

| Variables |                                     | Regression Model |      |       |       |         | Fitted Regression Model |      |       |         |
|-----------|-------------------------------------|------------------|------|-------|-------|---------|-------------------------|------|-------|---------|
| Dependent | Independent                         | VIF              | OR   | L95%  | U95%  | P value | OR                      | L95% | U95%  | P value |
| DAE       | Age ( $\geq 65$ years)              | <b>1.408</b>     | 0.51 | 0.15  | 1.67  | 0.267   |                         |      |       |         |
|           | Weight ( $\geq 65$ kg)              | <b>1.690</b>     | 1.27 | 0.28  | 5.74  | 0.756   | 2.70                    | 0.98 | 7.38  | 0.053   |
|           | Height ( $\geq 164$ cm)             | <b>1.260</b>     | 1.35 | 0.43  | 4.20  | 0.606   |                         |      |       |         |
|           | BMI ( $\geq 25$ kg/m <sup>2</sup> ) | <b>1.805</b>     | 1.60 | 0.408 | 6.31  | 0.498   |                         |      |       |         |
|           | ASA physical status ( $\geq 2$ )    | <b>1.446</b>     | 1.27 | 0.28  | 5.74  | 0.756   |                         |      |       |         |
|           | Elefeld vs. Schnider Model          | <b>1.091</b>     | 5.81 | 2.05  | 16.05 | <0.001  | 5.57                    | 2.04 | 15.20 | <0.001  |
| BSE       | Age ( $\geq 65$ years)              | <b>1.324</b>     | 1.08 | 0.24  | 4.70  | 0.921   |                         |      |       |         |
|           | Weight ( $\geq 65$ kg)              | <b>1.754</b>     | 2.84 | 0.48  | 16.7  | 0.246   | 2.71                    | 0.71 | 10.30 | 0.144   |
|           | Height ( $\geq 164$ cm)             | <b>1.314</b>     | 1.05 | 0.23  | 4.71  | 0.946   |                         |      |       |         |
|           | BMI ( $\geq 25$ kg/m <sup>2</sup> ) | <b>1.823</b>     | 0.89 | 0.15  | 5.06  | 0.896   |                         |      |       |         |
|           | ASA physical status ( $\geq 2$ )    | <b>1.345</b>     | 0.98 | 0.13  | 7.32  | 0.990   |                         |      |       |         |
|           | Elefeld vs. Schnider Model          | <b>1.019</b>     | 7.62 | 1.52  | 38.30 | 0.013   | 7.66                    | 1.54 | 38.10 | 0.012   |



|                   |                              |              |      |      |       |       |  |  |  |  |
|-------------------|------------------------------|--------------|------|------|-------|-------|--|--|--|--|
| <b>LAE = USRE</b> | Age (≥65 years)              | <b>1.389</b> | 0.60 | 0.03 | 10.90 | 0.730 |  |  |  |  |
|                   | Weight (≥65 kg)              | <b>1.811</b> | 0.28 | 0.01 | 7.92  | 0.462 |  |  |  |  |
|                   | Height (≥164 cm)             | <b>1.136</b> | 2.12 | 0.15 | 29.40 | 0.575 |  |  |  |  |
|                   | BMI (≥25 kg/m <sup>2</sup> ) | <b>2.011</b> | 2.32 | 0.07 | 76.08 | 0.637 |  |  |  |  |
|                   | ASA physical status (≥2)     | <b>1.502</b> | 0.58 | 0.02 | 12.60 | 0.734 |  |  |  |  |
|                   | Eleveld vs. Schnider Model   | <b>1.065</b> | 2.13 | 0.16 | 27.00 | 0.560 |  |  |  |  |

**Notes.** Logistic regression analysis was performed to explain the relationship between one dependent variable and various independent variables. Categorical independent variables were dichotomized as follows: age (younger patients [18–64 years] vs. older patients [≥65 years]); BMI (normal weight [18.5–24.9 kg/m<sup>2</sup>] vs. overweight [BMI ≥25 kg/m<sup>2</sup>]); ASA physical status (ASA 1 vs. ASA 2-3); weight and height were dichotomized according to mean value for continuous normally distributed variables or median value for continuous non-normally distributed variables. Odds Ratios with 95% confidence intervals were determined. Multicollinearity was assessed using variance inflation factors. Akaike information criterion and backward/forward stepwise regression analysis were used to choose the best model.

**Abbreviations.** BMI: body mass index; VIF: variance inflation factor; OR: Odds Ratio; L95%: lower limit of the 95% CI; U95%: upper limit of the 95% CI. ASA: American Society of Anesthesiologists; BMI: body mass index; LAE: lightening of anesthesia event; USRE: unwanted spontaneous responsiveness event; DAE: deepening of anesthesia event; BSuppE: burst suppression event.
